# Supplementary material for: Using iSUSTAIN™ to validate the chemical attributes of different approaches to the synthesis of tacn and bridged (bis)tacn ligands
Source: Royal Society of Chemistry journal article supplement (doi:10.1039/c6gc01896c), 2016-01-01
Supplement: c6gc01896c1.pdf [file c6gc01896c1.pdf]

## Electronic Supplementary Material

### Documentation of Data collated from the Excel spreadsheets obtained following input of experimental data into the iSUSTAIN Green Chemistry Index Version 2.0 web-based program

This document includes a Reaction Scheme showing the steps in the alternate routes for the synthesis of tacn (**1**) and bis(tacn) (**2**). The pages following the Scheme include all the inputs required to analyse each step against the 12 Principles of Green Chemistry using the iSUSTAIN program. There are 11 sections, one for each reaction step annotated in the Scheme as “iSUSTAIN 1”, ‘iSUSTAIN 2”, etc. Each section reports the score as a Metric against each Green Chemistry Principle, with the data illustrated as a spider graph.

Input data includes a “Bill of materials in” which includes information as to type and amount of material used in the process, and whether it is a catalyst and whether it is recycled and/or renewable. Scores are then calculated by the software in the program and values for the various Metrics (based on the Green Chemistry Principles 2, 3, 5, 7 and 9) are allocated.

Input data also includes a “Bill of materials out” which includes information as to type and amount of material resulting from the process, i.e. product and waste. The human and aquatic toxicity and biodegradability is calculated. Scores for the various Metrics (based on the Green Chemistry Principles 1, 4 and 10) are allocated by the program software.

Input data is also required for the process steps (heating, cooling, stirring, pressure, work-up, extraction, distillation, chromatography etc) to enable calculation of the energy efficiency and process complexity of the entire process. The program software then gives a score for the 2 relevant Metrics (based on the Green Chemistry Principles 6 and 8).

Finally two sets of criteria assess safety and risks of the process and points are awarded depending on Yes/No answer. One set gives a Metric based on Green Chemistry Principles 11 (real-time analysis, monitoring and control) and the other gives a Metric based on Green Chemistry Principles 12 (safe chemistry/process)

---

# Reaction Scheme

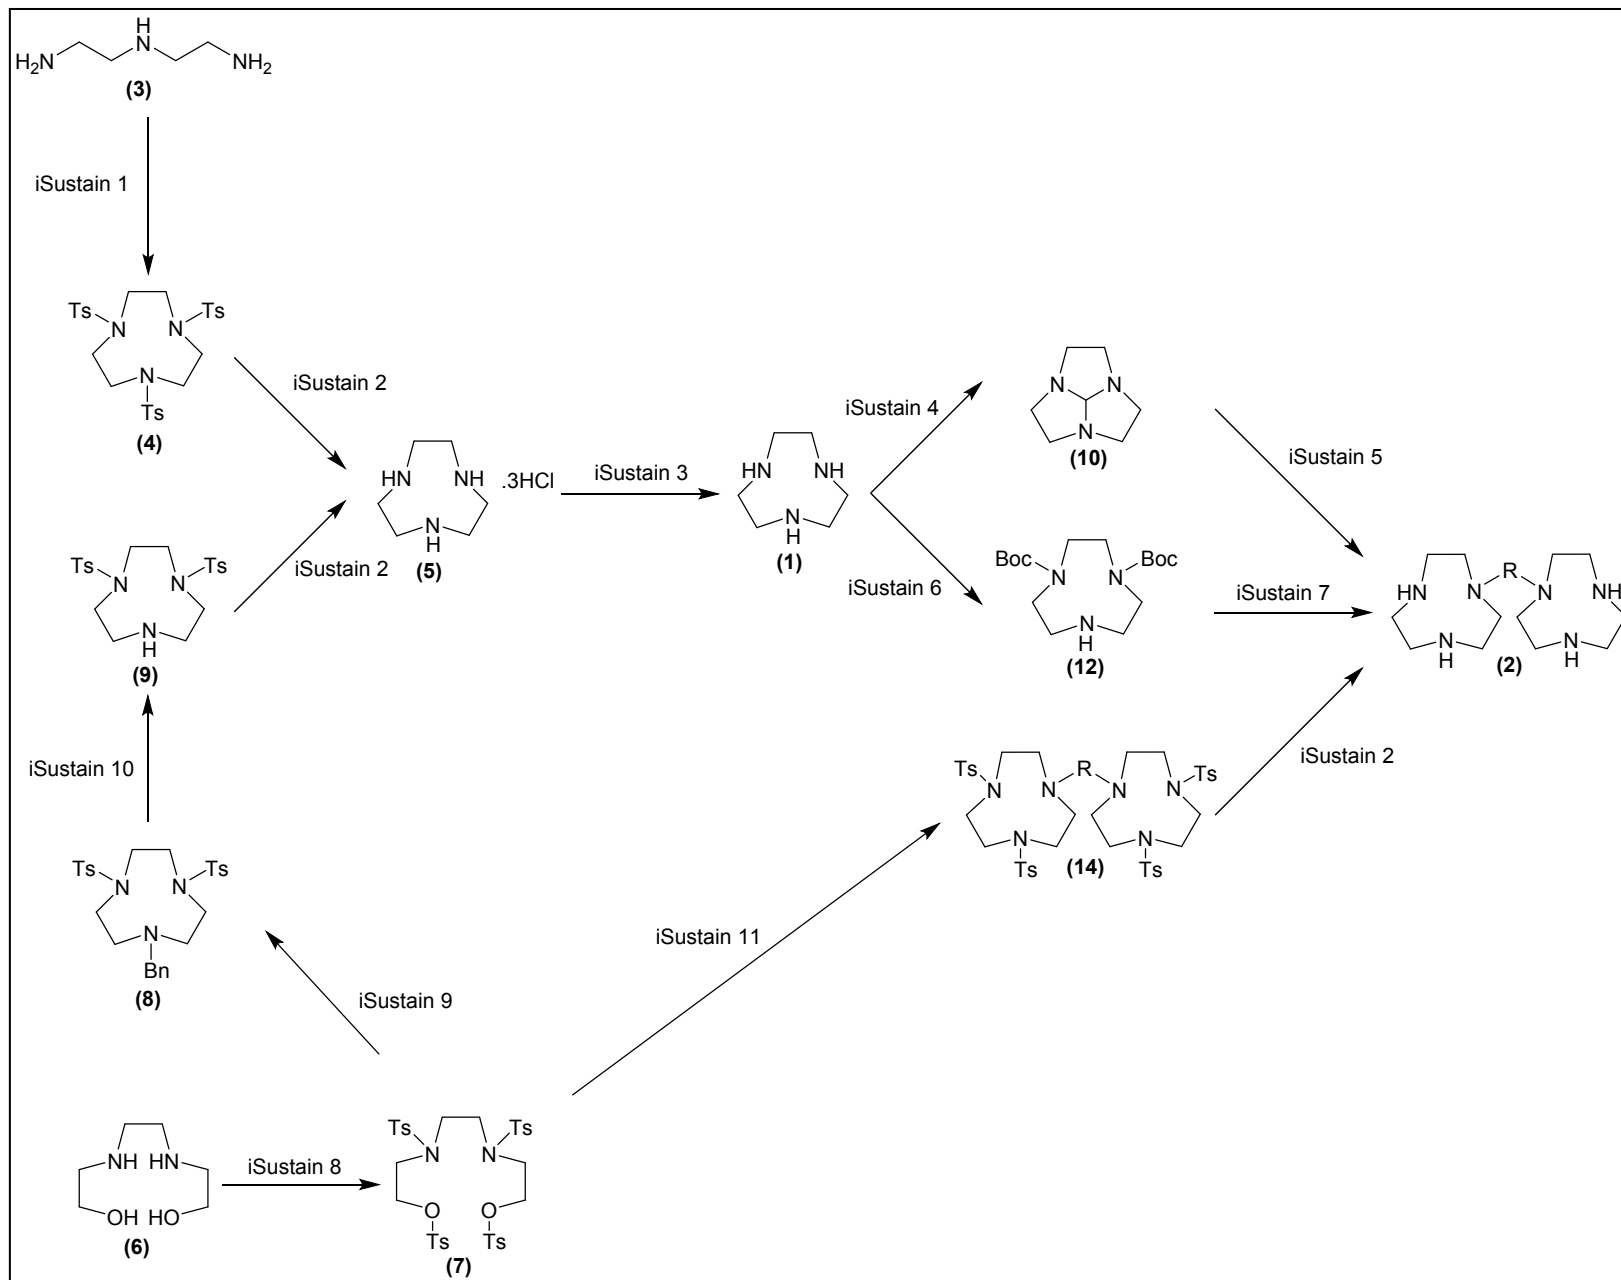

Scenario: Synthesis of Ts<sub>3</sub>Tacn (4)

Description:

iSUSTAIN 1

|                       |     |
|-----------------------|-----|
| 1. Waste Prevention   | 70  |
| 2. Atom Economy       | 55  |
| 3. Safe Raw Materials | 85  |
| 4. Safe Product       | 25  |
| 5. Safe Solvents      | 80  |
| 6. Energy Efficiency  | 0   |
| 7. Renewables         | 0   |
| 8. Process Complexity | 55  |
| 9. Catalysis          | 85  |
| 10. Biodegradability  | 10  |
| 11. Process Control   | 100 |
| 12. Safe Process      | 80  |

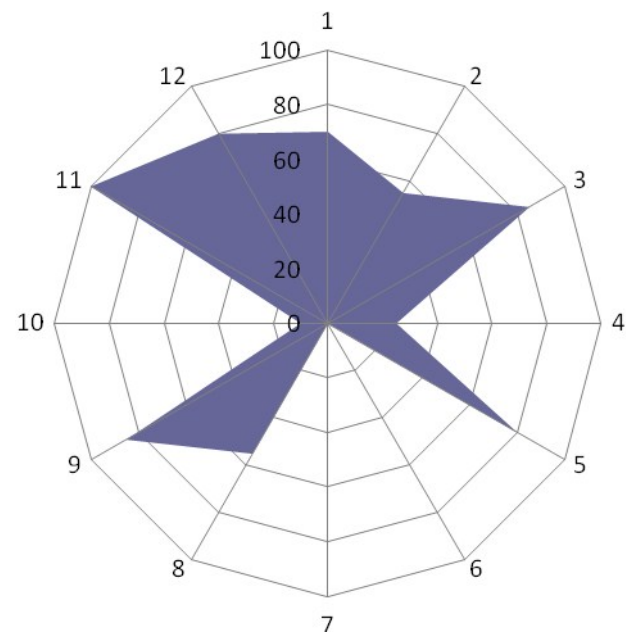

| Bill of Materials In              | Type of Material | Wt/ Batch  | Est. % Recycle | % Renew. | Catalyst Mole % | Usage Wt/Wt  | Safety     | Health    | Envir Impact | Regul Status | MatImp p  | Contrib to Proc Tot |
|-----------------------------------|------------------|------------|----------------|----------|-----------------|--------------|------------|-----------|--------------|--------------|-----------|---------------------|
| Water                             | Solvent          | 3,000      | 80             | 80       | 0               | 4.323        | 100        | 100       | 100          | 100          | 100       | 41%                 |
| Potassium carbonate               | Auxiliary        | 162        | 0              | 0        | 0               | 1.167        | 100        | 65        | 100          | 100          | 88        | 11%                 |
| <b>p-Toluenesulfonyl chloride</b> | <b>Raw</b>       | <b>209</b> | <b>0</b>       | <b>0</b> | <b>0</b>        | <b>1.507</b> | <b>100</b> | <b>55</b> | <b>100</b>   | <b>100</b>   | <b>85</b> | <b>14%</b>          |
| Caustic soda [sodium hydroxide]   | Auxiliary        | 127        | 0              | 0        | 0               | 0.916        | 100        | 35        | 100          | 100          | 78        | 9%                  |
| Tetrabutylammonium bromide        | Auxiliary        | 10         | 0              | 0        | 9               | 0.075        | 100        | 65        | 100          | 100          | 88        | 1%                  |
| Toluene                           | Solvent          | 1,600      | 80             | 80       | 0               | 2.305        | 55         | 55        | 100          | 50           | 35        | 22%                 |
| <b>Diethylenetriamine</b>         | <b>Raw</b>       | <b>36</b>  | <b>0</b>       | <b>0</b> | <b>0</b>        | <b>0.262</b> | <b>100</b> | <b>55</b> | <b>100</b>   | <b>100</b>   | <b>85</b> | <b>2%</b>           |

Metric 2) Atom Economy: Reaction Mass Efficiency = ..... 55

Metric 3) Safe Raw Materials: Total Process Material Impact = ..... 85

Metric 5) Safe Solvents: Total Process Auxiliary Material Impact = ..... 80

Metric 7) Renewables: Total % Process Renewable Feedstock (as-sold basis) = ..... 0

Metric 7) Renewables: Total % Process Renewable Feedstock (neat basis) = ..... 0

Metric 9) Minimum Catalyst Mole % = ..... 9

Metric 9) Normalized Catalyst Score % = ..... 85

| Bill of Materials Out     | Type of Material | Wt/ Batch | % Diluents | Severity Multiplier | Wt times Severity | Human Tox. Concern | Aq. Tox. Concern | Ultimate Biodeg. |
|---------------------------|------------------|-----------|------------|---------------------|-------------------|--------------------|------------------|------------------|
| <b>Ts<sub>3</sub>Tacn</b> | <b>Product</b>   | 139       | 0          |                     |                   | Moderate           | High             | 1.5              |
| 1,2-Dibromoethane         | Waste Class 2    | 80        |            | 4                   | 320               |                    |                  |                  |
| KCl                       | Waste Class 4    | 80        |            | 0.5                 | 40                |                    |                  |                  |
| NaBr                      | Waste Class 4    | 100       |            | 0.5                 | 50                |                    |                  |                  |

Metric 1) Environmental factor (E+-factor) = ..... 2.97

Metric 1) Waste Prevention: Normalized E+-Factor = ..... 70

Metric 4) Safe Product: DSfC = ..... 25

Metric 10) Biodegradability: Normalized Biodegradation = ..... 10

| Process Steps |                    | Reactors, etc. | Asset Count | In-Process Add/Remove |
|---------------|--------------------|----------------|-------------|-----------------------|
| Stirring      | Stirring           |                | 1           | 3                     |
| Heating       | Heating & Addition |                | 2           | 8                     |
| Step 3        |                    |                | 0           | 0                     |
| Step 4        |                    |                | 0           | 0                     |

| Temp (° C.) | Time (Hrs) | Pressure (Atm) | Total Weight | Ave. Heat Capacity | Step EE |
|-------------|------------|----------------|--------------|--------------------|---------|
| 90          | 96         | 1              | 4,000        | 4.2                | 13943.5 |
|             | 0          | 1              | 4,000        | 4.2                | 0.0     |
|             | 0          | 1              | 0            | 0.0                | 0.0     |
|             | 0          | 1              | 0            | 0.0                | 0.0     |

Metric 6) Total Energy Efficiency = ..... 13944  
Metric 6) Energy Efficiency: Normalized EE = ..... 0  
Metric 8) Process Complexity (PComplex) = .....  
. 3 + 11 = 14  
Metric 8) Process Complexity: Normalized PComplex = .....  
. 55

| Question |                                                                                                                                 | Answer | Points |
|----------|---------------------------------------------------------------------------------------------------------------------------------|--------|--------|
| 1)       | Does the potential exist in this process for the formation of hazardous side-products? (30 pts)                                 | No     | 30     |
| 2)       | Are adequate monitoring and control apparatus in place to quickly detect excursions in reactors and storage vessels? (0-50 pts) | Yes    | 50     |
| 3)       | Is the process common practice and/or in the scale-up or commercialization stages of production? (20 pts)                       | Yes    | 0      |
| a)       | Is there a regularly scheduled audit or check of this equipment? (10 pts)                                                       | Yes    | 10     |
| b)       | Do formal (written) catastrophe plans and emergency measures exist? (10 pts)                                                    | Yes    | 10     |

Metric 11) Real-Time Analysis: Total RTA = ..... 100

| Question                                                                                                                                                                                                                             | Risk     | Answer | Points |
|--------------------------------------------------------------------------------------------------------------------------------------------------------------------------------------------------------------------------------------|----------|--------|--------|
| 1) Are any extreme conditions (pressure $\geq 10$ atm., temperature $\geq 200^\circ$ C. or $\leq -78^\circ$ C.) used in the process? (20 pts)                                                                                        | High     | No     | 0      |
| 2) Does the potential exist for a runaway exotherm under the process or upset conditions (including violent polymerization)? (20 pts)                                                                                                | High     | No     | 0      |
| 3) Do any of the process materials or mixtures present an explosion hazard (contact, dust and/or peroxide-forming)? (20 pts)                                                                                                         | High     | No     | 0      |
| 4) Are there any process materials present initially or formed during this process that might restrict or exclude its use in the intended production facility (other high hazards than mentioned above, strong odor, etc.)? (20 pts) | High     | No     | 0      |
| 5) Is pressure between 1.0 and 10 atm or less than 20 mm of Hg used in this process (other than process steps for which Q1 may be true)? (10 pts)                                                                                    | Moderate | No     | 0      |
| 6) Are temperatures ranging from $150^\circ$ to $199^\circ$ C. or $-50^\circ$ to $-78^\circ$ C. used in this process (other than process steps for which Q1 may be true)? (10 pts)                                                   | Moderate | No     | 0      |
| 7) Is the reaction mixture flammable? (10 pts)                                                                                                                                                                                       | Moderate | Yes    | 10     |
| 8) Are any of the process mixtures pyrophoric or hypergolic? (10 pts)                                                                                                                                                                | Moderate | No     | 0      |
| 9) Do any of the process mixtures react violently with water? (5 pts)                                                                                                                                                                | Mild     | No     | 0      |
| 10) Is a gas generated in any part of this process? (5 pts)                                                                                                                                                                          | Mild     | No     | 0      |
| 11) Are any of the process mixtures corrosive ( $\text{pH} \leq 2$ or $\geq 12$ )? (5 pts)                                                                                                                                           | Mild     | Yes    | 5      |
| 12) Are any of the process mixtures irritants or lachrymators? (5 pts)                                                                                                                                                               | Mild     | Yes    | 5      |

Total Yes Points = ..... 20

**Metric 12) Inherently Safer Chemistry: Process Safety = ..... 80**

.

**Scenario:** Synthesis of Tacn.3HCl (5)

**Description:** Ts<sub>3</sub>Tacn (4) was not present in the database so 1,4,7,10-tetrakis(p-toluensulfonyl)-1,4,7,10-tetraazacyclododecane was used.

### iSUSTAIN 2

|                       |     |
|-----------------------|-----|
| 1. Waste Prevention   | 55  |
| 2. Atom Economy       | 5   |
| 3. Safe Raw Materials | 75  |
| 4. Safe Product       | 50  |
| 5. Safe Solvents      | 85  |
| 6. Energy Efficiency  | 0   |
| 7. Renewables         | 0   |
| 8. Process Complexity | 40  |
| 9. Catalysis          | 0   |
| 10. Biodegradability  | 75  |
| 11. Process Control   | 100 |
| 12. Safe Process      | 90  |

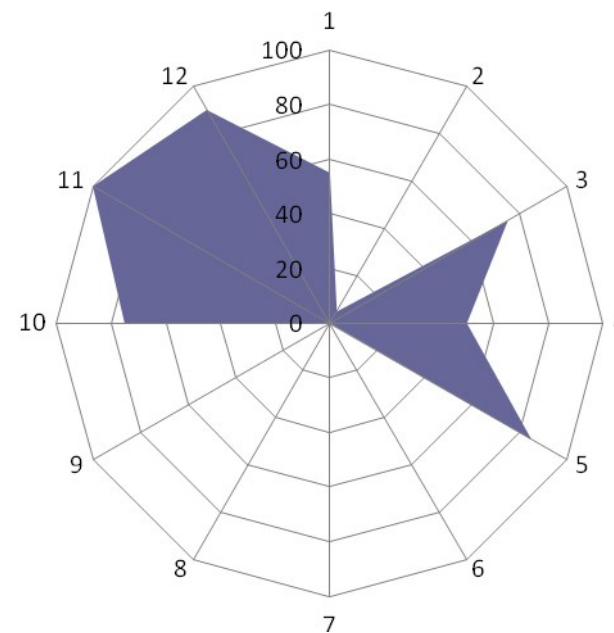

| Bill of Materials In                                                      | Type of Material | Wt/ Batch  | Est. % Recycle | % Renew. | Catalyst Mole % | Usage Wt/ Wt  | Safety     | Health    | Envir Impact | Regul Status | Matl mp   | Contrib to Proc Tot |
|---------------------------------------------------------------------------|------------------|------------|----------------|----------|-----------------|---------------|------------|-----------|--------------|--------------|-----------|---------------------|
| <b>Sulfuric Acid</b>                                                      | <b>Raw</b>       | <b>450</b> | <b>0</b>       | <b>0</b> | <b>0</b>        | <b>10.022</b> | <b>100</b> | <b>35</b> | <b>100</b>   | <b>100</b>   | <b>78</b> | <b>30%</b>          |
| Ethanol                                                                   | Auxiliary        | 1,500      | 80             | 80       | 0               | 6.682         | 55         | 100       | 100          | 100          | 85        | <b>20%</b>          |
| Diethyl ether                                                             | Auxiliary        | 900        | 80             | 80       | 0               | 4.009         | 15         | 80        | 100          | 100          | 65        | <b>12%</b>          |
| Water                                                                     | Auxiliary        | 1,000      | 80             | 80       | 0               | 4.454         | 100        | 100       | 100          | 100          | 100       | <b>13%</b>          |
| Celite 512 medium                                                         | Auxiliary        | 50         | 0              | 0        | 0               | 1.114         | 100        | 55        | 100          | 100          | 85        | <b>3%</b>           |
| <b>Hydrochloric acid</b>                                                  | <b>Raw</b>       | <b>200</b> | <b>0</b>       | <b>0</b> | <b>0</b>        | <b>4.454</b>  | <b>100</b> | <b>55</b> | <b>100</b>   | <b>100</b>   | <b>85</b> | <b>13%</b>          |
| <b>1,4,7,10-Tetrakis(p-toluensulfonyl)-1,4,7,10-tetraazacyclododecane</b> | <b>Raw</b>       | <b>136</b> | <b>0</b>       | <b>0</b> | <b>0</b>        | <b>3.029</b>  | <b>100</b> | <b>55</b> | <b>0</b>     | <b>100</b>   | <b>51</b> | <b>9%</b>           |

Metric 2) Atom Economy: Reaction Mass Efficiency = ..... 5

Metric 3) Safe Raw Materials: Total Process Material Impact = ..... 75

Metric 5) Safe Solvents: Total Process Auxiliary Material Impact = .....v 85

Metric 7) Renewables: Total % Process Renewable Feedstock (as-sold basis) = ..... 0

Metric 7) Renewables: Total % Process Renewable Feedstock (neat basis) = ..... 0

Metric 9) Minimum Catalyst Mole % = ..... 0

Metric 9) Normalized Catalyst Score % = ..... 0

| Bill of Materials Out | Type of Material | Wt/ Batch | % Diluents | Severity Multiplier | Wt times Severity | Human Tox. Concern | Aq. Tox. Concern | Ultimate Biodeg. |
|-----------------------|------------------|-----------|------------|---------------------|-------------------|--------------------|------------------|------------------|
| <b>Tacn.3HCl</b>      | <b>Product</b>   | 45        | 0          |                     |                   | Moderate           | Moderate         | 4                |
| Tosic Acid            | Waste Class 4    | 100       |            | 0.5                 | 50                |                    |                  |                  |
| Sulphuric Acid        | Waste Class 4    | 400       |            | 0.5                 | 200               |                    |                  |                  |
|                       |                  |           |            |                     |                   |                    |                  |                  |

Metric 1) Environmental factor (E+ factor) = ..... 5.68

Metric 1) Waste Prevention: Normalized E+-Factor = ..... 55

Metric 4) Safe Product: DSfC = ..... 50

Metric 10) Biodegradability: Normalized Biodegradation = ..... 75



| Process Steps                | Reactors, etc. | Asset Count | In-Process Add/Remove |
|------------------------------|----------------|-------------|-----------------------|
| Heating & Stirring           |                | 3           | 1                     |
| Drip into Ice                |                | 2           | 1                     |
| Filter                       |                | 1           | 1                     |
| Dissolve in H <sub>2</sub> O |                | 1           | 1                     |
| Filter                       |                | 1           | 1                     |
| Rotavap                      |                | 1           | 1                     |
| Add HCl + Filter Salt        |                | 1           | 2                     |

| Temp. (° C.) | Time (Hrs) | Pressure (Atm) | Total Weight | Ave. Heat Capacity | Step EE |
|--------------|------------|----------------|--------------|--------------------|---------|
| 120          | 72         | 1              | 500          | 4.2                | 6061.5  |
|              | 0          | 1              | 0            | 0.0                | 0.0     |
|              | 0          | 1              | 0            | 0.0                | 0.0     |
|              | 0          | 1              | 0            | 0.0                | 0.0     |
|              | 0          | 1              | 0            | 0.0                | 0.0     |
|              | 0          | 1              | 0            | 0.0                | 0.0     |
|              | 0          | 1              | 0            | 0.0                | 0.0     |

**Metric 6) Total Energy Efficiency =** ..... **6061.5**  
**Metric 6) Energy Efficiency: Normalized EE =** ..... **0**  
**Metric 8) Process Complexity (PComplex) =** ..... **10 + 8 = 18**  
**Metric 8) Process Complexity: Normalized PComplex =** ..... **40**

| Question                                                                                                                           | Answer | Points |
|------------------------------------------------------------------------------------------------------------------------------------|--------|--------|
| 1) Does the potential exist in this process for the formation of hazardous side-products? (30 pts)                                 | No     | 30     |
| 2) Are adequate monitoring and control apparatus in place to quickly detect excursions in reactors and storage vessels? (0-50 pts) | Yes    | 50     |
| 3) Is the process common practice and/or in the scale-up or commercialization stages of production? (20 pts)                       | Yes    | 0      |
| a) Is there a regularly scheduled audit or check of this equipment? (10 pts)                                                       | Yes    | 10     |
| b) Do formal (written) catastrophe plans and emergency measures exist? (10 pts)                                                    | Yes    | 10     |

**Metric 11) Real-Time Analysis: Total RTA =** ..... **100**

| Question |                                                                                                                                                                                                                                   | Risk     | Answer | Points |
|----------|-----------------------------------------------------------------------------------------------------------------------------------------------------------------------------------------------------------------------------------|----------|--------|--------|
| 1)       | Are any extreme conditions (pressure $\geq 10$ atm., temperature $\geq 200^\circ$ C. or $\leq -78^\circ$ C.) used in the process? (20 pts)                                                                                        | High     | No     | 0      |
| 2)       | Does the potential exist for a runaway exotherm under the process or upset conditions (including violent polymerization)? (20 pts)                                                                                                | High     | No     | 0      |
| 3)       | Do any of the process materials or mixtures present an explosion hazard (contact, dust and/or peroxide-forming)? (20 pts)                                                                                                         | High     | No     | 0      |
| 4)       | Are there any process materials present initially or formed during this process that might restrict or exclude its use in the intended production facility (other high hazards than mentioned above, strong odor, etc.)? (20 pts) | High     | No     | 0      |
| 5)       | Is pressure between 1.0 and 10 atm or less than 20 mm of Hg used in this process (other than process steps for which Q1 may be true)? (10 pts)                                                                                    | Moderate | No     | 0      |
| 6)       | Are temperatures ranging from $150^\circ$ to $199^\circ$ C. or $-50^\circ$ to $-78^\circ$ C. used in this process (other than process steps for which Q1 may be true)? (10 pts)                                                   | Moderate | No     | 0      |
| 7)       | Is the reaction mixture flammable? (10 pts)                                                                                                                                                                                       | Moderate | No     | 0      |
| 8)       | Are any of the process mixtures pyrophoric or hypergolic? (10 pts)                                                                                                                                                                | Moderate | No     | 0      |
| 9)       | Do any of the process mixtures react violently with water? (5 pts)                                                                                                                                                                | Mild     | No     | 0      |
| 10)      | Is a gas generated in any part of this process? (5 pts)                                                                                                                                                                           | Mild     | No     | 0      |
| 11)      | Are any of the process mixtures corrosive ( $\text{pH} \leq 2$ or $\geq 12$ )? (5 pts)                                                                                                                                            | Mild     | Yes    | 5      |
| 12)      | Are any of the process mixtures irritants or lachrymators? (5 pts)                                                                                                                                                                | Mild     | Yes    | 5      |

Total Yes Points = ..... 10

**Metric 12) Inherently Safer Chemistry: Process Safety = ..... 90**

**Scenario:** Synthesis of Free Tacn (1)

**Description:** Tacn.3HCl was not present in the database. Instead the product was used as a raw material for the safety data.

### iSUSTAIN 3

|                       |    |
|-----------------------|----|
| 1. Waste Prevention   | 75 |
| 2. Atom Economy       | 20 |
| 3. Safe Raw Materials | 80 |
| 4. Safe Product       | 50 |
| 5. Safe Solvents      | 50 |
| 6. Energy Efficiency  | 0  |
| 7. Renewables         | 0  |
| 8. Process Complexity | 70 |
| 9. Catalysis          | 0  |
| 10. Biodegradability  | 75 |
| 11. Process Control   | 80 |
| 12. Safe Process      | 80 |

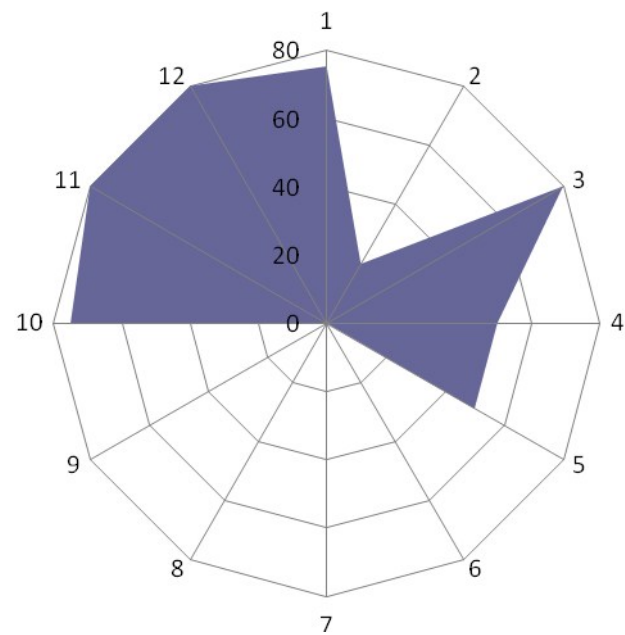

| Bill of Materials In            | Type of Material | Wt/ Batch | Est. %<br>Recycle | %<br>Renew | Cataly<br>st<br>Mole<br>% | Usag<br>e<br>Wt/<br>Wt | Safet<br>y | Healt<br>h | Envir<br>Impa<br>ct | Regul<br>Statu<br>s | Matl<br>mp | Contrib<br>to Proc<br>Tot |
|---------------------------------|------------------|-----------|-------------------|------------|---------------------------|------------------------|------------|------------|---------------------|---------------------|------------|---------------------------|
| 1,4,7-triazacyclononane         | Raw              | 44        | 0                 | 0          | 0                         | 2.544                  | 100        | 55         | 100                 | 100                 | 85         | 9%                        |
| Water                           | Solvent          | 500       | 80                | 80         | 0                         | 5.718                  | 100        | 100        | 100                 | 100                 | 100        | 21%                       |
| Caustic soda [sodium hydroxide] | Raw              | 36        | 0                 | 0          | 0                         | 2.030                  | 100        | 35         | 100                 | 100                 | 78         | 7%                        |
| Toluene                         | Solvent          | 1,500     | 80                | 80         | 0                         | 17.153                 | 55         | 55         | 100                 | 50                  | 35         | 63%                       |

Metric 2) Atom Economy: Reaction Mass Efficiency = ..... 20

Metric 3) Safe Raw Materials: Total Process Material Impact = ..... 80

Metric 5) Safe Solvents: Total Process Auxiliary Material Impact = ..... 50

Metric 7) Renewables: Total % Process Renewable Feedstock (as-sold basis) = ..... 0

Metric 7) Renewables: Total % Process Renewable Feedstock (neat basis) = ..... 0

Metric 9) Minimum Catalyst Mole % = ..... 0

Metric 9) Normalized Catalyst Score % = ..... 0

| Bill of Materials Out   | Type of Material | Wt/ Batch | %<br>Diluents | Severity<br>Multiplier | Wt times<br>Severity | Human<br>Tox.<br>Concern | Aq. Tox.<br>Concern | Ultima<br>te<br>Biode<br>g. |
|-------------------------|------------------|-----------|---------------|------------------------|----------------------|--------------------------|---------------------|-----------------------------|
| 1,4,7-Triazacyclononane | Product          | 17        | 0             |                        |                      | Moderate                 | Moderate            | 4                           |
| NaCl                    | Waste Class 3    | 20        |               | 2                      | 40                   |                          |                     |                             |
|                         |                  |           |               |                        |                      |                          |                     |                             |
|                         |                  |           |               |                        |                      |                          |                     |                             |

Metric 1) Environmental factor (E+ factor) = ..... 2.35

Metric 1) Waste Prevention: Normalized E+-Factor = ..... 75

Metric 4) Safe Product: DSfC = ..... 50

Metric 10) Biodegradability: Normalized Biodegradation = ..... 75

| Process Steps | Reactors, etc. | Asset Count | In-Process Add/Remove |
|---------------|----------------|-------------|-----------------------|
| Rotavap Water |                | 1           | 1                     |
| Dean Stark    |                | 3           | 3                     |
| Rotavap       |                | 1           | 1                     |
| Step 4        |                | 0           | 0                     |
| Step 5        |                | 0           | 0                     |

| Tem p. (° C.) | Time (Hrs) | Pressure (Atm) | Total Weig ht | Ave. Heat Capacit y | Step EE  |
|---------------|------------|----------------|---------------|---------------------|----------|
|               | 0          | 1              | 0             | 0.0                 | 0.0      |
| 120           | 48         | 1              | 500           | 4.2                 | 10373 .9 |
|               | 0          | 1              | 0             | 0.0                 | 0.0      |
|               | 0          | 1              | 0             | 0.0                 | 0.0      |
|               | 0          | 1              | 0             | 0.0                 | 0.0      |

Metric 6) Total Energy Efficiency = ..... **10374**  
Metric 6) Energy Efficiency: Normalized EE = ..... **0**  
Metric 8) Process Complexity (PComplex) = ..... **5 + 5 = 10**  
Metric 8) Process Complexity: Normalized PComplex = ..... **70**

| Question                                                                                                                           | Answer | Point s |
|------------------------------------------------------------------------------------------------------------------------------------|--------|---------|
| 1) Does the potential exist in this process for the formation of hazardous side-products? (30 pts)                                 | No     | 30      |
| 2) Are adequate monitoring and control apparatus in place to quickly detect excursions in reactors and storage vessels? (0-50 pts) | Yes    | 50      |
| 3) Is the process common practice and/or in the scale-up or commercialization stages of production? (20 pts)                       | Yes    | 0       |
| a) Is there a regularly scheduled audit or check of this equipment? (10 pts)                                                       |        |         |
| b) Do formal (written) catastrophe plans and emergency measures exist? (10 pts)                                                    |        |         |

Metric 11) Real-Time Analysis: Total RTA = ..... **80**

| Question |                                                                                                                                                                                                                                   | Risk     | Answer | Points |
|----------|-----------------------------------------------------------------------------------------------------------------------------------------------------------------------------------------------------------------------------------|----------|--------|--------|
| 1)       | Are any extreme conditions (pressure $\geq 10$ atm., temperature $\geq 200^\circ$ C. or $\leq -78^\circ$ C.) used in the process? (20 pts)                                                                                        | High     | No     | 0      |
| 2)       | Does the potential exist for a runaway exotherm under the process or upset conditions (including violent polymerization)? (20 pts)                                                                                                | High     | No     | 0      |
| 3)       | Do any of the process materials or mixtures present an explosion hazard (contact, dust and/or peroxide-forming)? (20 pts)                                                                                                         | High     | No     | 0      |
| 4)       | Are there any process materials present initially or formed during this process that might restrict or exclude its use in the intended production facility (other high hazards than mentioned above, strong odor, etc.)? (20 pts) | High     | No     | 0      |
| 5)       | Is pressure between 1.0 and 10 atm or less than 20 mm of Hg used in this process (other than process steps for which Q1 may be true)? (10 pts)                                                                                    | Moderate | No     | 0      |
| 6)       | Are temperatures ranging from $150^\circ$ to $199^\circ$ C. or $-50^\circ$ to $-78^\circ$ C. used in this process (other than process steps for which Q1 may be true)? (10 pts)                                                   | Moderate | No     | 0      |
| 7)       | Is the reaction mixture flammable? (10 pts)                                                                                                                                                                                       | Moderate | Yes    | 10     |
| 8)       | Are any of the process mixtures pyrophoric or hypergolic? (10 pts)                                                                                                                                                                | Moderate | No     | 0      |
| 9)       | Do any of the process mixtures react violently with water? (5 pts)                                                                                                                                                                | Mild     | No     | 0      |
| 10)      | Is a gas generated in any part of this process? (5 pts)                                                                                                                                                                           | Mild     | No     | 0      |
| 11)      | Are any of the process mixtures corrosive ( $\text{pH} \leq 2$ or $\geq 12$ )? (5 pts)                                                                                                                                            | Mild     | Yes    | 5      |
| 12)      | Are any of the process mixtures irritants or lachrymators? (5 pts)                                                                                                                                                                | Mild     | Yes    | 5      |

Total Yes Points = ..... 20

**Metric 12) Inherently Safer Chemistry: Process Safety = ..... 80**

Scenario: **Synthesis of Tacn Orthoamide (10)**

Description:

**iSUSTAIN 4**

|                       |     |
|-----------------------|-----|
| 1. Waste Prevention   | 70  |
| 2. Atom Economy       | 45  |
| 3. Safe Raw Materials | 80  |
| 4. Safe Product       | 50  |
| 5. Safe Solvents      | 35  |
| 6. Energy Efficiency  | 0   |
| 7. Renewables         | 0   |
| 8. Process Complexity | 75  |
| 9. Catalysis          | 0   |
| 10. Biodegradability  | 75  |
| 11. Process Control   | 100 |
| 12. Safe Process      | 75  |

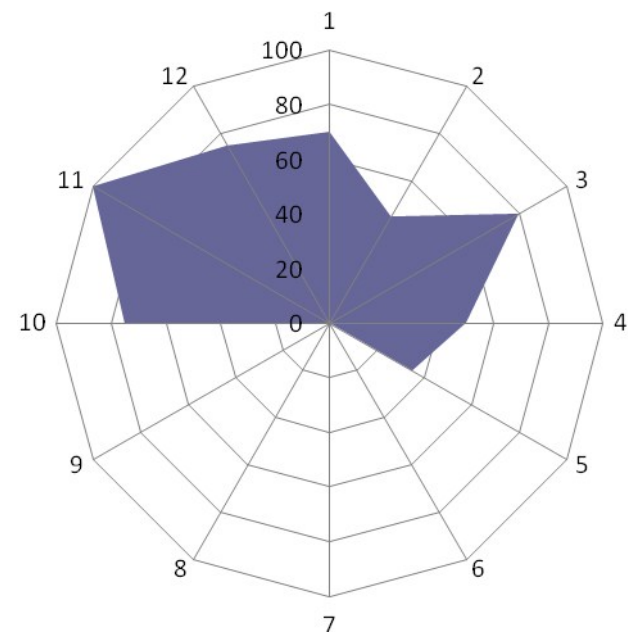

| Bill of Materials In                  | Type of Material | Wt/ Batch | Est. %<br>Recycle | %<br>Renew. | Cataly<br>st<br>Mole<br>% | Usag<br>e<br>Wt/<br>Wt | Safet<br>y | Healt<br>h | Envir<br>Impa<br>ct | Regu<br>l<br>Statu<br>s | Matl<br>mp | Contrib<br>to Proc<br>Tot |
|---------------------------------------|------------------|-----------|-------------------|-------------|---------------------------|------------------------|------------|------------|---------------------|-------------------------|------------|---------------------------|
| 1,4,7-Triazacyclononane               | Raw              | 17        | 0                 | 0           | 0                         | 1.164                  | 100        | 55         | 100                 | 100                     | 85         | 21%                       |
| Toluene                               | Solvent          | 250       | 80                | 80          | 0                         | 3.329                  | 55         | 55         | 100                 | 50                      | 35         | 60%                       |
| N,N-Dimethylformamide dimethyl acetal | Raw              | 16        | 0                 | 0           | 0                         | 1.071                  | 55         | 65         | 100                 | 100                     | 73         | 19%                       |

**Metric 2) Atom Economy: Reaction Mass Efficiency =** ..... **45**  
**Metric 3) Safe Raw Materials: Total Process Material Impact =** ..... **80**  
**Metric 5) Safe Solvents: Total Process Auxiliary Material Impact =** ..... **35**  
**Metric 7) Renewables: Total % Process Renewable Feedstock (as-sold basis) =** ..... **0**  
**Metric 7) Renewables: Total % Process Renewable Feedstock (neat basis) =** ..... **0**  
**Metric 9) Minimum Catalyst Mole % =** ..... **0**  
**Metric 9) Normalized Catalyst Score % =** ..... **0**

| Bill of Materials Out | Type of Material | Wt/ Batch | %<br>Diluent<br>s | Severity<br>Multiplier | Wt times<br>Severity | Human<br>Tox.<br>Concern | Aq. Tox.<br>Concern | Ultimate<br>Biodeg. |
|-----------------------|------------------|-----------|-------------------|------------------------|----------------------|--------------------------|---------------------|---------------------|
| Tacn Orthoamide       | Product          | 15        | 0                 |                        |                      | Moderate                 | Moderate            | 4                   |
| MeOH                  | Waste Class 2    | 10        |                   | 4                      | 40                   |                          |                     |                     |
| Dimethylamine         | Waste Class 2    | 2         |                   | 4                      | 8                    |                          |                     |                     |
|                       |                  |           |                   |                        |                      |                          |                     |                     |

**Metric 1) Environmental factor (E+ factor) =** ..... **3.20**  
**Metric 1) Waste Prevention: Normalized E+-Factor =** ..... **70**  
**Metric 4) Safe Product: DSfC =** ..... **50**  
**Metric 10) Biodegradability: Normalized Biodegradation =** ..... **75**



| Process Steps | Reactors, etc. | Asset Count | In-Process Add/Remove |
|---------------|----------------|-------------|-----------------------|
| Dean Stark    | 2              | 3           | 1                     |
| Rotavap       | 2              | 2           | 1                     |
| Kugelrohr     | 2              | 1           | 1                     |
| Step 4        |                | 0           | 0                     |

| Temp. (° C.) | Time (Hrs) | Pressure (Atm) | Total Weight | Ave. Heat Capacity | Step EE |
|--------------|------------|----------------|--------------|--------------------|---------|
| 120          | 24         | 1              | 500          | 4.2                | 6039.9  |
| 40           | 1          | 0.2            | 500          | 4.2                | 139.8   |
| 80           | 0          | 0.1            | 50           | 4.2                | 0.0     |
|              | 0          | 1              | 0            | 0.0                | 0.0     |

**Metric 6) Total Energy Efficiency = ..... 6180**  
**Metric 6) Energy Efficiency: Normalized EE = ..... 0**  
**Metric 8) Process Complexity (PComplex) = ..... 6 + 3 = 9**  
**Metric 8) Process Complexity: Normalized PComplex = ..... 75**

| Question                                                                                                                           | Answer | Points |
|------------------------------------------------------------------------------------------------------------------------------------|--------|--------|
| 1) Does the potential exist in this process for the formation of hazardous side-products? (30 pts)                                 | No     | 30     |
| 2) Are adequate monitoring and control apparatus in place to quickly detect excursions in reactors and storage vessels? (0-50 pts) | Yes    | 50     |
| 3) Is the process common practice and/or in the scale-up or commercialization stages of production? (20 pts)                       | Yes    | 0      |
| a) Is there a regularly scheduled audit or check of this equipment? (10 pts)                                                       | Yes    | 10     |
| b) Do formal (written) catastrophe plans and emergency measures exist? (10 pts)                                                    | Yes    | 10     |

**Metric 11) Real-Time Analysis: Total RTA = . . . . . 100**

| Question |                                                                                                                                                                                                                                   | Risk     | Answer | Points |
|----------|-----------------------------------------------------------------------------------------------------------------------------------------------------------------------------------------------------------------------------------|----------|--------|--------|
| 1)       | Are any extreme conditions (pressure $\geq 10$ atm., temperature $\geq 200^\circ$ C. or $\leq -78^\circ$ C.) used in the process? (20 pts)                                                                                        | High     | No     | 0      |
| 2)       | Does the potential exist for a runaway exotherm under the process or upset conditions (including violent polymerization)? (20 pts)                                                                                                | High     | No     | 0      |
| 3)       | Do any of the process materials or mixtures present an explosion hazard (contact, dust and/or peroxide-forming)? (20 pts)                                                                                                         | High     | No     | 0      |
| 4)       | Are there any process materials present initially or formed during this process that might restrict or exclude its use in the intended production facility (other high hazards than mentioned above, strong odor, etc.)? (20 pts) | High     | No     | 0      |
| 5)       | Is pressure between 1.0 and 10 atm or less than 20 mm of Hg used in this process (other than process steps for which Q1 may be true)? (10 pts)                                                                                    | Moderate | Yes    | 10     |
| 6)       | Are temperatures ranging from $150^\circ$ to $199^\circ$ C. or $-50^\circ$ to $-78^\circ$ C. used in this process (other than process steps for which Q1 may be true)? (10 pts)                                                   | Moderate | No     | 0      |
| 7)       | Is the reaction mixture flammable? (10 pts)                                                                                                                                                                                       | Moderate | Yes    | 10     |
| 8)       | Are any of the process mixtures pyrophoric or hypergolic? (10 pts)                                                                                                                                                                | Moderate | No     | 0      |
| 9)       | Do any of the process mixtures react violently with water? (5 pts)                                                                                                                                                                | Mild     | No     | 0      |
| 10)      | Is a gas generated in any part of this process? (5 pts)                                                                                                                                                                           | Mild     | No     | 0      |
| 11)      | Are any of the process mixtures corrosive ( $\text{pH} \leq 2$ or $\geq 12$ )? (5 pts)                                                                                                                                            | Mild     | No     | 0      |
| 12)      | Are any of the process mixtures irritants or lachrymators? (5 pts)                                                                                                                                                                | Mild     | Yes    | 5      |

Total Yes Points = . . . . . 25

**Metric 12) Inherently Safer Chemistry: Process Safety = . . . . . 75**

**Scenario:** Synthesis of Bis(tacn) Salt (2)

**Description:** Tacn orthoamide (10) was not present in the database and tacn (1) was used for the safety data.

#### iSUSTAIN 5

|                       |     |
|-----------------------|-----|
| 1. Waste Prevention   | 70  |
| 2. Atom Economy       | 80  |
| 3. Safe Raw Materials | 85  |
| 4. Safe Product       | 50  |
| 5. Safe Solvents      | 80  |
| 6. Energy Efficiency  | 0   |
| 7. Renewables         | 0   |
| 8. Process Complexity | 40  |
| 9. Catalysis          | 0   |
| 10. Biodegradability  | 75  |
| 11. Process Control   | 100 |
| 12. Safe Process      | 80  |

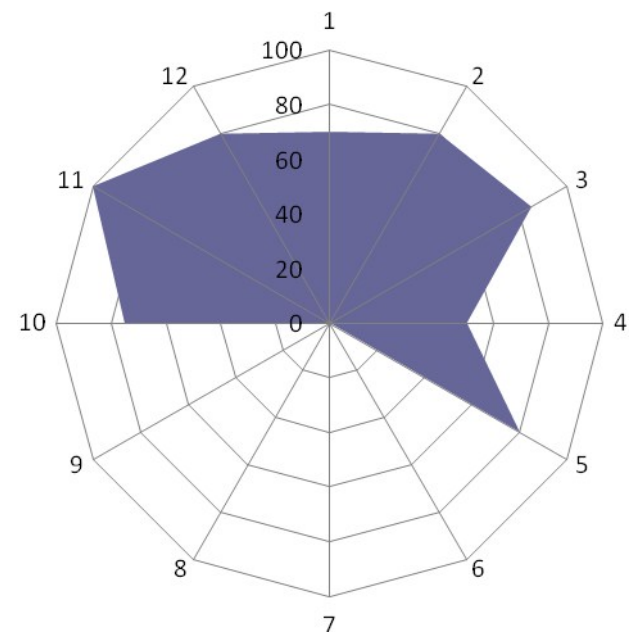

| Bill of Materials In               | Type of Material | Wt/ Batch | Est. % Recycle | % Renew. | Catalyst Mole % | Usage Wt/Wt | Safety | Health | Envir Impact | Regul Status | MatImp | Contrib to Proc Tot |
|------------------------------------|------------------|-----------|----------------|----------|-----------------|-------------|--------|--------|--------------|--------------|--------|---------------------|
| $\alpha,\alpha'$ -Dibromo-m-xylene | Raw              | 3         | 0              | 0        | 0               | 0.693       | 100    | 55     | 100          | 100          | 85     | 4%                  |
| 1,4,7-Triazacyclononane            | Raw              | 3         | 0              | 0        | 0               | 0.569       | 100    | 55     | 100          | 100          | 85     | 3%                  |
| Acetonitrile                       | Solvent          | 120       | 80             | 80       | 0               | 4.878       | 55     | 65     | 100          | 100          | 73     | 25%                 |
| Hydrochloric acid                  | Diluent          | 50        | 0              | 0        | 0               | 10.163      | 100    | 55     | 100          | 100          | 85     | 53%                 |
| Ethanol                            | Auxiliary        | 50        | 80             | 80       | 0               | 2.033       | 55     | 100    | 100          | 100          | 85     | 11%                 |
| Diethyl ether                      | Auxiliary        | 25        | 80             | 80       | 0               | 1.016       | 15     | 80     | 100          | 100          | 65     | 5%                  |

Metric 2) Atom Economy: Reaction Mass Efficiency = ..... 80

Metric 3) Safe Raw Materials: Total Process Material Impact = ..... 85

Metric 5) Safe Solvents: Total Process Auxiliary Material Impact = ..... 80

..

Metric 7) Renewables: Total % Process Renewable Feedstock (as-sold basis) = ..... 0

..

Metric 7) Renewables: Total % Process Renewable Feedstock (neat basis) = ..... 0

Metric 9) Minimum Catalyst Mole % = ..... 0

..

Metric 9) Normalized Catalyst Score % = ..... 0

..

| Bill of Materials Out | Type of Material | Wt/ Batch | % Diluents | Severity Multiplier | Wt times Severity | Human Tox. Concern | Aq. Tox. Concern | Ultimate Biodeg. |
|-----------------------|------------------|-----------|------------|---------------------|-------------------|--------------------|------------------|------------------|
| Bis(tacn)             | Product          | 5         | 0          |                     |                   | Moderate           | Moderate         | 4                |
| HBr                   | Waste Class 4    | 2         |            | 0.5                 | 0                 |                    |                  |                  |
| HCl                   | Waste Class 4    | 20        |            | 0.5                 | 10                |                    |                  |                  |
|                       |                  |           |            |                     |                   |                    |                  |                  |

Metric 1) Environmental factor (E+-factor) = ..... 2.70

..

Metric 1) Waste Prevention: Normalized E+-Factor = ..... 70

Metric 4) Safe Product: DSfC = ..... 50

..

Metric 10) Biodegradability: Normalized Biodegradation = ..... 75

..

| Process Steps     | Reactors, etc. | Asset Count | In-Process Add/Remove |
|-------------------|----------------|-------------|-----------------------|
| Dropwise addition |                | 3           | 1                     |
| Stirring          |                | 2           | 0                     |
| Filtration        |                | 3           | 1                     |
| Reflux            |                | 3           | 1                     |
| Rotavap           |                | 2           | 1                     |

| Temp (° C.) | Time (Hrs) | Pressure (Atm) | Total Weight | Ave. Heat Capacity | Step EE |
|-------------|------------|----------------|--------------|--------------------|---------|
| 25          | 1          | 1              | 0            | 4.2                | 0.0     |
| 25          | 48         | 1              | 0            | 4.2                | 0.0     |
| 25          | 1          | 1              | 0            | 4.2                | 0.0     |
| 120         | 14         | 1              | 100          | 4.2                | 2151.2  |
| 25          | 1          | 1              | 0            | 0.0                | 0.0     |

Metric 6) Total Energy Efficiency = ..... 2151

Metric 6) Energy Efficiency: Normalized EE = ..... 0

Metric 8) Process Complexity (PComplex) = .....

.. 13 + 4 = 17

Metric 8) Process Complexity: Normalized PComplex = .....

.. 40

| Question                                                                                                                           | Answer | Points |
|------------------------------------------------------------------------------------------------------------------------------------|--------|--------|
| 1) Does the potential exist in this process for the formation of hazardous side-products? (30 pts)                                 | No     | 30     |
| 2) Are adequate monitoring and control apparatus in place to quickly detect excursions in reactors and storage vessels? (0-50 pts) | Yes    | 50     |
| 3) Is the process common practice and/or in the scale-up or commercialization stages of production? (20 pts)                       | Yes    | 0      |
| a) Is there a regularly scheduled audit or check of this equipment? (10 pts)                                                       | Yes    | 10     |
| b) Do formal (written) catastrophe plans and emergency measures exist? (10 pts)                                                    | Yes    | 10     |

Metric 11) Real-Time Analysis: Total RTA = ..... 100

| Question |                                                                                                                                                                                                                                   | Risk     | Answer | Points |
|----------|-----------------------------------------------------------------------------------------------------------------------------------------------------------------------------------------------------------------------------------|----------|--------|--------|
| 1)       | Are any extreme conditions (pressure $\geq 10$ atm., temperature $\geq 200^\circ$ C. or $\leq -78^\circ$ C.) used in the process? (20 pts)                                                                                        | High     | No     | 0      |
| 2)       | Does the potential exist for a runaway exotherm under the process or upset conditions (including violent polymerization)? (20 pts)                                                                                                | High     | No     | 0      |
| 3)       | Do any of the process materials or mixtures present an explosion hazard (contact, dust and/or peroxide-forming)? (20 pts)                                                                                                         | High     | No     | 0      |
| 4)       | Are there any process materials present initially or formed during this process that might restrict or exclude its use in the intended production facility (other high hazards than mentioned above, strong odor, etc.)? (20 pts) | High     | No     | 0      |
| 5)       | Is pressure between 1.0 and 10 atm or less than 20 mm of Hg used in this process (other than process steps for which Q1 may be true)? (10 pts)                                                                                    | Moderate | No     | 0      |
| 6)       | Are temperatures ranging from $150^\circ$ to $199^\circ$ C. or $-50^\circ$ to $-78^\circ$ C. used in this process (other than process steps for which Q1 may be true)? (10 pts)                                                   | Moderate | No     | 0      |
| 7)       | Is the reaction mixture flammable? (10 pts)                                                                                                                                                                                       | Moderate | Yes    | 10     |
| 8)       | Are any of the process mixtures pyrophoric or hypergolic? (10 pts)                                                                                                                                                                | Moderate | No     | 0      |
| 9)       | Do any of the process mixtures react violently with water? (5 pts)                                                                                                                                                                | Mild     | No     | 0      |
| 10)      | Is a gas generated in any part of this process? (5 pts)                                                                                                                                                                           | Mild     | No     | 0      |
| 11)      | Are any of the process mixtures corrosive ( $\text{pH} \leq 2$ or $\geq 12$ )? (5 pts)                                                                                                                                            | Mild     | Yes    | 5      |
| 12)      | Are any of the process mixtures irritants or lachrymators? (5 pts)                                                                                                                                                                | Mild     | Yes    | 5      |

Total Yes Points = ..... 20

**Metric 12) Inherently Safer Chemistry: Process Safety** = ..... **80**

**Scenario:** Synthesis of DiBoc Tacn (12)

**Description:**

**iSUSTAIN 6**

|                       |     |
|-----------------------|-----|
| 1. Waste Prevention   | 100 |
| 2. Atom Economy       | 85  |
| 3. Safe Raw Materials | 85  |
| 4. Safe Product       | 50  |
| 5. Safe Solvents      | 75  |
| 6. Energy Efficiency  | 95  |
| 7. Renewables         | 0   |
| 8. Process Complexity | 40  |
| 9. Catalysis          | 0   |
| 10. Biodegradability  | 60  |
| 11. Process Control   | 100 |
| 12. Safe Process      | 80  |

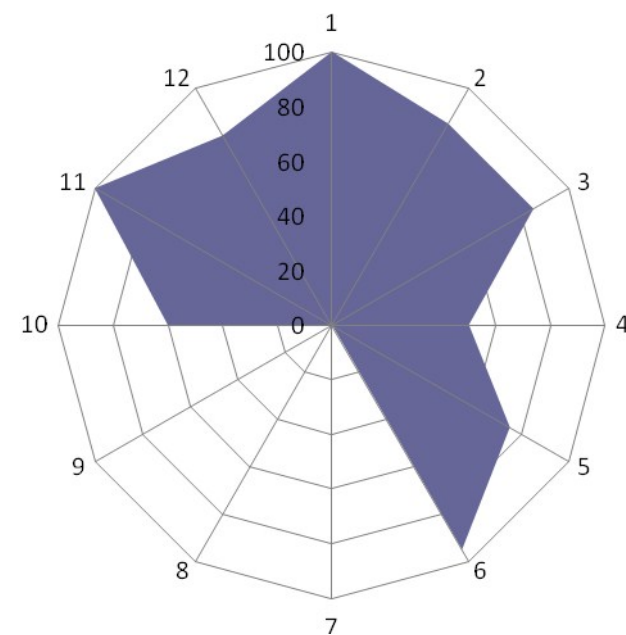





Metric 1) Environmental factor (E+-factor) = ..... 0.00  
 Metric 1) Waste Prevention: Normalized E+-Factor = ..... 100  
 Metric 4) Safe Product: DSfC = ..... 50  
 Metric 10) Biodegradability: Normalized Biodegradation = ..... 60

| Process Steps | Reactors, etc. | Asset Count | In-Process Add/Remove |
|---------------|----------------|-------------|-----------------------|
| Stirring      |                | 2           | 1                     |
| Rotavap       |                | 1           | 1                     |
| washing       |                | 4           | 9                     |
| Step 4        |                | 0           | 0                     |

| Temp (° C.) | Time (Hrs) | Pressure (Atm) | Total Weight | Ave. Heat Capacity | Step EE |
|-------------|------------|----------------|--------------|--------------------|---------|
| 25          | 1          | 1              | 800          | 4.2                | 0.0     |
| 40          | 1          | 1              | 800          | 4.2                | 6.6     |
|             | 0          | 1              | 0            | 0.0                | 0.0     |
|             | 0          | 1              | 0            | 0.0                | 0.0     |

Metric 6) Total Energy Efficiency = ..... 7  
 Metric 6) Energy Efficiency: Normalized EE = ..... 95  
 Metric 8) Process Complexity (PComplex) = ..... 7 + 11 = 18  
 Metric 8) Process Complexity: Normalized PComplex = ..... 40

| Question                                                                                                                           | Answer | Points |
|------------------------------------------------------------------------------------------------------------------------------------|--------|--------|
| 1) Does the potential exist in this process for the formation of hazardous side-products? (30 pts)                                 | No     | 30     |
| 2) Are adequate monitoring and control apparatus in place to quickly detect excursions in reactors and storage vessels? (0-50 pts) | Yes    | 50     |
| 3) Is the process common practice and/or in the scale-up or commercialization stages of production? (20 pts)                       | Yes    | 0      |
| a) Is there a regularly scheduled audit or check of this equipment? (10 pts)                                                       | Yes    | 10     |
| b) Do formal (written) catastrophe plans and emergency measures exist? (10 pts)                                                    | Yes    | 10     |

Metric 11) Real-Time Analysis: Total RTA = ..... 100

| Question |                                                                                                                                                                                                                                   | Risk     | Answer | Points |
|----------|-----------------------------------------------------------------------------------------------------------------------------------------------------------------------------------------------------------------------------------|----------|--------|--------|
| 1)       | Are any extreme conditions (pressure $\geq 10$ atm., temperature $\geq 200^\circ$ C. or $\leq -78^\circ$ C.) used in the process? (20 pts)                                                                                        | High     | No     | 0      |
| 2)       | Does the potential exist for a runaway exotherm under the process or upset conditions (including violent polymerization)? (20 pts)                                                                                                | High     | No     | 0      |
| 3)       | Do any of the process materials or mixtures present an explosion hazard (contact, dust and/or peroxide-forming)? (20 pts)                                                                                                         | High     | No     | 0      |
| 4)       | Are there any process materials present initially or formed during this process that might restrict or exclude its use in the intended production facility (other high hazards than mentioned above, strong odor, etc.)? (20 pts) | High     | No     | 0      |
| 5)       | Is pressure between 1.0 and 10 atm or less than 20 mm of Hg used in this process (other than process steps for which Q1 may be true)? (10 pts)                                                                                    | Moderate | No     | 0      |
| 6)       | Are temperatures ranging from $150^\circ$ to $199^\circ$ C. or $-50^\circ$ to $-78^\circ$ C. used in this process (other than process steps for which Q1 may be true)? (10 pts)                                                   | Moderate | No     | 0      |
| 7)       | Is the reaction mixture flammable? (10 pts)                                                                                                                                                                                       | Moderate | Yes    | 10     |
| 8)       | Are any of the process mixtures pyrophoric or hypergolic? (10 pts)                                                                                                                                                                | Moderate | No     | 0      |
| 9)       | Do any of the process mixtures react violently with water? (5 pts)                                                                                                                                                                | Mild     | No     | 0      |
| 10)      | Is a gas generated in any part of this process? (5 pts)                                                                                                                                                                           | Mild     | No     | 0      |
| 11)      | Are any of the process mixtures corrosive ( $\text{pH} \leq 2$ or $\geq 12$ )? (5 pts)                                                                                                                                            | Mild     | Yes    | 5      |
| 12)      | Are any of the process mixtures irritants or lachrymators? (5 pts)                                                                                                                                                                | Mild     | Yes    | 5      |

Total Yes Points = ..... 20

**Metric 12) Inherently Safer Chemistry: Process Safety = ..... 80**

**Scenario:** Synthesis of Bis-Tacn Salt (2)  
**Description:** Diboc Tacn (12) was not present in the database so tacn (1) was used

### iSUSTAIN 7

|                       |     |
|-----------------------|-----|
| 1. Waste Prevention   | 65  |
| 2. Atom Economy       | 40  |
| 3. Safe Raw Materials | 85  |
| 4. Safe Product       | 50  |
| 5. Safe Solvents      | 65  |
| 6. Energy Efficiency  | 0   |
| 7. Renewables         | 0   |
| 8. Process Complexity | 15  |
| 9. Catalysis          | 0   |
| 10. Biodegradability  | 75  |
| 11. Process Control   | 100 |
| 12. Safe Process      | 80  |

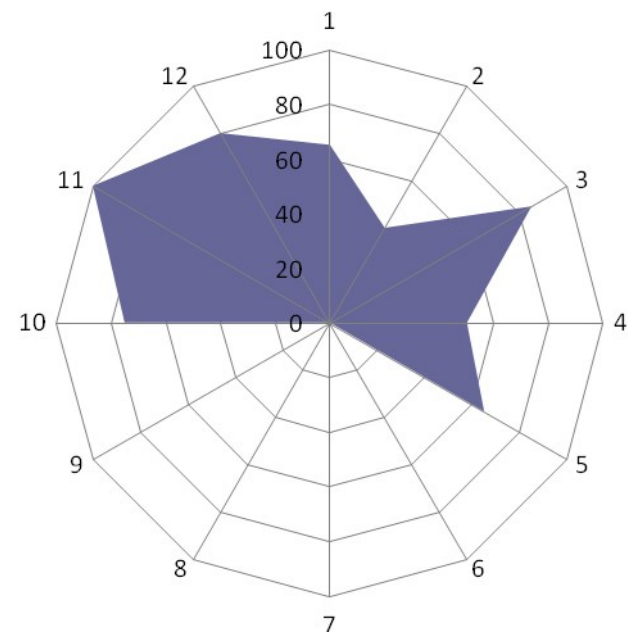

| Bill of Materials In               | Type of Material | Wt/ Batch | Est. %<br>Recycle | %<br>Renew | Cataly<br>st<br>Mole<br>% | Usag<br>e<br>Wt/<br>Wt | Safet<br>y | Healt<br>h | Envir<br>Impa<br>ct | Regu<br>l<br>Statu<br>s | Matl<br>mp | Contrib<br>to Proc<br>Tot |
|------------------------------------|------------------|-----------|-------------------|------------|---------------------------|------------------------|------------|------------|---------------------|-------------------------|------------|---------------------------|
| $\alpha,\alpha'$ -Dibromo-m-xylene | Raw              | 4         | 0                 | 0          | 0                         | 0.761                  | 100        | 55         | 100                 | 100                     | 85         | 1%                        |
| 1,4,7-Triazacyclononane            | Raw              | 8         | 0                 | 0          | 0                         | 1.722                  | 100        | 55         | 100                 | 100                     | 85         | 1%                        |
| Triethylamine                      | Auxiliary        | 1         | 0                 | 0          | 0                         | 0.217                  | 55         | 35         | 100                 | 100                     | 63         | 0%                        |
| Acetonitrile                       | Solvent          | 100       | 80                | 80         | 0                         | 4.348                  | 55         | 65         | 100                 | 100                     | 73         | 4%                        |
| Sodium hydroxide [caustic soda]    | Auxiliary        | 100       | 0                 | 0          | 0                         | 21.73<br>g             | 100        | 35         | 100                 | 100                     | 78         | 19%                       |
| Water                              | Auxiliary        | 50        | 0                 | 0          | 0                         | 10.87<br>0             | 100        | 100        | 100                 | 100                     | 100        | 9%                        |
| Sodium chloride                    | Auxiliary        | 50        | 0                 | 0          | 0                         | 10.87<br>0             | 100        | 65         | 100                 | 100                     | 88         | 9%                        |
| Dichloromethane                    | Auxiliary        | 40        | 80                | 80         | 0                         | 1.739                  | 100        | 55         | 100                 | 0                       | 0          | 1%                        |
| Ethyl acetate                      | Auxiliary        | 500       | 80                | 80         | 0                         | 21.73<br>g             | 55         | 80         | 100                 | 100                     | 78         | 19%                       |
| Hexane, n-                         | Auxiliary        | 500       | 80                | 80         | 0                         | 21.73<br>g             | 55         | 55         | 35                  | 50                      | 24         | 19%                       |
| Silica, crystalline, cristobalite  | Auxiliary        | 50        | 0                 | 0          | 0                         | 10.87<br>0             | 100        | 35         | 100                 | 50                      | 39         | 9%                        |
| Hydrochloric acid                  | Diluent          | 50        | 0                 | 0          | 0                         | 10.87<br>0             | 100        | 55         | 100                 | 100                     | 85         | 9%                        |

|                                                                                          |           |           |
|------------------------------------------------------------------------------------------|-----------|-----------|
| <b>Metric 2) Atom Economy: Reaction Mass Efficiency =</b> .....                          | <b>40</b> |           |
| <b>Metric 3) Safe Raw Materials: Total Process Material Impact =</b> .....               |           | <b>75</b> |
| <b>Metric 5) Safe Solvents: Total Process Auxiliary Material Impact =</b> .....          |           | <b>65</b> |
| <b>Metric 7) Renewables: Total % Process Renewable Feedstock (as-sold basis) =</b> ..... | <b>0</b>  |           |
| <b>Metric 7) Renewables: Total % Process Renewable Feedstock (neat basis) =</b> .....    | <b>0</b>  |           |
| <b>Metric 9) Minimum Catalyst Mole % =</b> .....                                         | <b>0</b>  |           |
| <b>Metric 9) Normalized Catalyst Score % =</b> .....                                     | <b>0</b>  |           |

| Bill of Materials Out | Type of Material | Wt/ Batch | % Diluents | Severity Multiplier | Wt times Severity | Human Tox. Concern | Aq. Tox. Concern | Ultimate Biodeg. |
|-----------------------|------------------|-----------|------------|---------------------|-------------------|--------------------|------------------|------------------|
| Bis(tacn)             | Product          | 5         | 0          |                     |                   | Moderate           | Moderate         | 4                |
| tert-Butanol          | Waste Class 2    | 3         |            | 4                   | 10                |                    |                  |                  |
| Triethylamine HBr     | Waste Class 3    | 2         |            | 2                   | 4                 |                    |                  |                  |
|                       |                  |           |            |                     |                   |                    |                  |                  |

Metric 1) Environmental factor (E+ factor) = ..... 3.50  
Metric 1) Waste Prevention: Normalized E+-Factor = ..... 65  
Metric 4) Safe Product: DSfC = ..... 50  
Metric 10) Biodegradability: Normalized Biodegradation = ..... 75

| Process Steps      | Reactors, etc. | Asset Count | In-Process Add/Remove |
|--------------------|----------------|-------------|-----------------------|
| Heating & Stirring |                | 3           | 1                     |
| Washes             |                | 3           | 6                     |
| Column             |                | 3           | 4                     |
| Treatment with HCl |                | 0           | 0                     |
| Rotavap x 2        |                | 4           | 2                     |

| Temp. (° C.) | Time (Hrs) | Pressure (Atm) | Total Weight | Ave. Heat Capacity | Step EE |
|--------------|------------|----------------|--------------|--------------------|---------|
| 85           | 72         | 1              | 200          | 4.2                | 14462.6 |
|              | 1          | 1              | 0            | 0.0                | 0.0     |
|              | 0          | 1              | 0            | 0.0                | 0.0     |
|              | 0          | 1              | 0            | 0.0                | 0.0     |
|              | 0          | 1              | 0            | 0.0                | 0.0     |

Metric 6) Total Energy Efficiency = ..... 14463  
Metric 6) Energy Efficiency: Normalized EE = ..... 0  
Metric 8) Process Complexity (PComplex) = ..... 13 + 13 = 26  
Metric 8) Process Complexity: Normalized PComplex = ..... 15

| Question |                                                                                                                                 | Answer | Points |
|----------|---------------------------------------------------------------------------------------------------------------------------------|--------|--------|
| 1)       | Does the potential exist in this process for the formation of hazardous side-products? (30 pts)                                 | No     | 30     |
| 2)       | Are adequate monitoring and control apparatus in place to quickly detect excursions in reactors and storage vessels? (0-50 pts) | Yes    | 50     |
| 3)       | Is the process common practice and/or in the scale-up or commercialization stages of production? (20 pts)                       | Yes    | 0      |
| a)       | Is there a regularly scheduled audit or check of this equipment? (10 pts)                                                       | Yes    | 10     |
| b)       | Do formal (written) catastrophe plans and emergency measures exist? (10 pts)                                                    | Yes    | 10     |

**Metric 11) Real-Time Analysis: Total RTA = ..... 100**

| Question |                                                                                                                                                                                                                                   | Risk     | Answer | Points |
|----------|-----------------------------------------------------------------------------------------------------------------------------------------------------------------------------------------------------------------------------------|----------|--------|--------|
| 1)       | Are any extreme conditions (pressure $\geq 10$ atm., temperature $\geq 200^\circ$ C. or $\leq -78^\circ$ C.) used in the process? (20 pts)                                                                                        | High     | No     | 0      |
| 2)       | Does the potential exist for a runaway exotherm under the process or upset conditions (including violent polymerization)? (20 pts)                                                                                                | High     | No     | 0      |
| 3)       | Do any of the process materials or mixtures present an explosion hazard (contact, dust and/or peroxide-forming)? (20 pts)                                                                                                         | High     | No     | 0      |
| 4)       | Are there any process materials present initially or formed during this process that might restrict or exclude its use in the intended production facility (other high hazards than mentioned above, strong odor, etc.)? (20 pts) | High     | No     | 0      |
| 5)       | Is pressure between 1.0 and 10 atm or less than 20 mm of Hg used in this process (other than process steps for which Q1 may be true)? (10 pts)                                                                                    | Moderate | No     | 0      |
| 6)       | Are temperatures ranging from $150^\circ$ to $199^\circ$ C. or $-50^\circ$ to $-78^\circ$ C. used in this process (other than process steps for which Q1 may be true)? (10 pts)                                                   | Moderate | No     | 0      |
| 7)       | Is the reaction mixture flammable? (10 pts)                                                                                                                                                                                       | Moderate | Yes    | 10     |
| 8)       | Are any of the process mixtures pyrophoric or hypergolic? (10 pts)                                                                                                                                                                | Moderate | No     | 0      |
| 9)       | Do any of the process mixtures react violently with water? (5 pts)                                                                                                                                                                | Mild     | No     | 0      |
| 10)      | Is a gas generated in any part of this process? (5 pts)                                                                                                                                                                           | Mild     | No     | 0      |
| 11)      | Are any of the process mixtures corrosive ( $\text{pH} \leq 2$ or $\geq 12$ )? (5 pts)                                                                                                                                            | Mild     | Yes    | 5      |
| 12)      | Are any of the process mixtures irritants or lachrymators? (5 pts)                                                                                                                                                                | Mild     | Yes    | 5      |

Total Yes Points = ..... 20

**Metric 12) Inherently Safer Chemistry: Process Safety = ..... 80**

**Scenario:** Synthesis of 3,6-Di(tosyl)-3,6-diazaoctane-1,8-di(toluene-4-sulfonate) (7)

**Description:**

**iSUSTAIN 8**

|                       |     |
|-----------------------|-----|
| 1. Waste Prevention   | 55  |
| 2. Atom Economy       | 65  |
| 3. Safe Raw Materials | 85  |
| 4. Safe Product       | 25  |
| 5. Safe Solvents      | 80  |
| 6. Energy Efficiency  | 35  |
| 7. Renewables         | 0   |
| 8. Process Complexity | 30  |
| 9. Catalysis          | 0   |
| 10. Biodegradability  | 25  |
| 11. Process Control   | 100 |
| 12. Safe Process      | 90  |

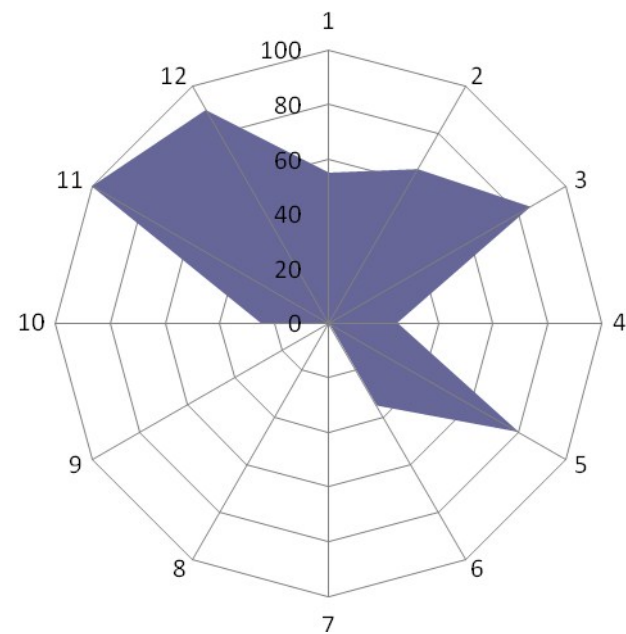

| Bill of Materials In                           | Type of Material | Wt/ Batch  | Est. % Recycle | % Renew. | Catalyst Mole % | Usage Wt/Wt  | Safety     | Health    | Envir Impact | Regul Status | MatImp P  | Contrib to Proc Tot |
|------------------------------------------------|------------------|------------|----------------|----------|-----------------|--------------|------------|-----------|--------------|--------------|-----------|---------------------|
| <b>N,N'-Bis(2-hydroxyethyl)ethylenediamine</b> | <b>Raw</b>       | <b>19</b>  | <b>0</b>       | <b>0</b> | <b>0</b>        | <b>0.256</b> | <b>100</b> | <b>55</b> | <b>100</b>   | <b>100</b>   | <b>85</b> | <b>4%</b>           |
| Pyridine                                       | Solvent          | 140        | 80             | 80       | 0               | 0.368        | 55         | 65        | 100          | 100          | 73        | 5%                  |
| <b>p-Toluenesulfonyl chloride</b>              | <b>Raw</b>       | <b>100</b> | <b>0</b>       | <b>0</b> | <b>0</b>        | <b>1.314</b> | <b>100</b> | <b>55</b> | <b>100</b>   | <b>100</b>   | <b>85</b> | <b>19%</b>          |
| Hydrochloric acid                              | Solvent          | 200        | 0              | 0        | 0               | 2.628        | 100        | 55        | 100          | 100          | 85        | 39%                 |
| Water                                          | Solvent          | 600        | 80             | 80       | 0               | 1.577        | 100        | 100       | 100          | 100          | 100       | 23%                 |
| Methanol                                       | Solvent          | 100        | 80             | 80       | 0               | 0.263        | 55         | 0         | 100          | 100          | 51        | 4%                  |
| Dichloromethane                                | Solvent          | 100        | 80             | 80       | 0               | 0.263        | 100        | 55        | 100          | 0            | 0         | 4%                  |
| Acetonitrile                                   | Solvent          | 50         | 80             | 80       | 0               | 0.131        | 55         | 65        | 100          | 100          | 73        | 2%                  |

**Metric 2) Atom Economy: Reaction Mass Efficiency =** ..... **65**  
**Metric 3) Safe Raw Materials: Total Process Material Impact =** ..... **75**  
**Metric 5) Safe Solvents: Total Process Auxiliary Material Impact =** ..... **80**  
**Metric 7) Renewables: Total % Process Renewable Feedstock (as-sold basis) =** ..... **0**  
**Metric 7) Renewables: Total % Process Renewable Feedstock (neat basis) =** ..... **0**  
**Metric 9) Minimum Catalyst Mole % =** ..... **0**  
**Metric 9) Normalized Catalyst Score % =** ..... **0**

| Bill of Materials Out                                            | Type of Material | Wt/ Batch | % Diluents | Severity Multiplier | Wt times Severity | Human Tox. Concern | Aq. Tox. Concern | Ultimate Biodeg. |
|------------------------------------------------------------------|------------------|-----------|------------|---------------------|-------------------|--------------------|------------------|------------------|
| <b>3,6-Di(tosyl)-3,6-diazaoctane-1,8-di(toluene-4-sulfonate)</b> | <b>Product</b>   | 76        | 0          |                     |                   | Moderate           | High             | 2                |
| Pyridine HCl                                                     | Waste Class 2    | 100       |            | 4                   | 400               |                    |                  |                  |
|                                                                  |                  |           |            |                     |                   |                    |                  |                  |
|                                                                  |                  |           |            |                     |                   |                    |                  |                  |

**Metric 1) Environmental factor (E+-factor) =** ..... **5.26**  
**Metric 1) Waste Prevention: Normalized E+-Factor =** ..... **55**  
**Metric 4) Safe Product: DSfC =** ..... **25**  
**Metric 10) Biodegradability: Normalized Biodegradation =** ..... **25**



| Process Steps  | Reactors, etc. | Asset Count | In-Process Add/Remove |
|----------------|----------------|-------------|-----------------------|
| Stirring       |                | 2           | 2                     |
| Stirring       |                | 1           | 1                     |
| Addtion to HCl |                | 3           | 1                     |
| Wash           |                | 3           | 4                     |
| Filter         |                | 3           | 1                     |

| Temp (° C.) | Time (Hrs) | Pressure (Atm) | Total Weight | Ave. Heat Capacity | Step EE |
|-------------|------------|----------------|--------------|--------------------|---------|
| 0           | 4          | 1              | 500          | 4.2                | 276.0   |
| 25          | 12         | 1              | 500          | 4.2                | 0.0     |
|             | 0          | 1              | 0            | 0.0                | 0.0     |
|             | 0          | 1              | 0            | 0.0                | 0.0     |
|             | 0          | 1              | 0            | 0.0                | 0.0     |

Metric 6) Total Energy Efficiency = ..... 276  
 Metric 6) Energy Efficiency: Normalized EE = ..... 35  
 Metric 8) Process Complexity (PComplex) = ..... 12 + 9 = 21  
 Metric 8) Process Complexity: Normalized PComplex = ..... 30

| Question                                                                                                                           | Answer | Points |
|------------------------------------------------------------------------------------------------------------------------------------|--------|--------|
| 1) Does the potential exist in this process for the formation of hazardous side-products? (30 pts)                                 | No     | 30     |
| 2) Are adequate monitoring and control apparatus in place to quickly detect excursions in reactors and storage vessels? (0-50 pts) | Yes    | 50     |
| 3) Is the process common practice and/or in the scale-up or commercialization stages of production? (20 pts)                       | No     | 20     |
| a) Is there a regularly scheduled audit or check of this equipment? (10 pts)                                                       |        |        |
| b) Do formal (written) catastrophe plans and emergency measures exist? (10 pts)                                                    |        |        |

Metric 11) Real-Time Analysis: Total RTA = ..... 100

| Question |                                                                                                                                                                                                                                   | Risk     | Answer | Points |
|----------|-----------------------------------------------------------------------------------------------------------------------------------------------------------------------------------------------------------------------------------|----------|--------|--------|
| 1)       | Are any extreme conditions (pressure $\geq 10$ atm., temperature $\geq 200^\circ$ C. or $\leq -78^\circ$ C.) used in the process? (20 pts)                                                                                        | High     | No     | 0      |
| 2)       | Does the potential exist for a runaway exotherm under the process or upset conditions (including violent polymerization)? (20 pts)                                                                                                | High     | No     | 0      |
| 3)       | Do any of the process materials or mixtures present an explosion hazard (contact, dust and/or peroxide-forming)? (20 pts)                                                                                                         | High     | No     | 0      |
| 4)       | Are there any process materials present initially or formed during this process that might restrict or exclude its use in the intended production facility (other high hazards than mentioned above, strong odor, etc.)? (20 pts) | High     | No     | 0      |
| 5)       | Is pressure between 1.0 and 10 atm or less than 20 mm of Hg used in this process (other than process steps for which Q1 may be true)? (10 pts)                                                                                    | Moderate | Yes    | 10     |
| 6)       | Are temperatures ranging from $150^\circ$ to $199^\circ$ C. or $-50^\circ$ to $-78^\circ$ C. used in this process (other than process steps for which Q1 may be true)? (10 pts)                                                   | Moderate | No     | 0      |
| 7)       | Is the reaction mixture flammable? (10 pts)                                                                                                                                                                                       | Moderate | No     | 0      |
| 8)       | Are any of the process mixtures pyrophoric or hypergolic? (10 pts)                                                                                                                                                                | Moderate | No     | 0      |
| 9)       | Do any of the process mixtures react violently with water? (5 pts)                                                                                                                                                                | Mild     | No     | 0      |
| 10)      | Is a gas generated in any part of this process? (5 pts)                                                                                                                                                                           | Mild     | No     | 0      |
| 11)      | Are any of the process mixtures corrosive ( $\text{pH} \leq 2$ or $\geq 12$ )? (5 pts)                                                                                                                                            | Mild     | No     | 0      |
| 12)      | Are any of the process mixtures irritants or lachrymators? (5 pts)                                                                                                                                                                | Mild     | No     | 0      |

Total Yes Points = ..... 10

**Metric 12) Inherently Safer Chemistry: Process Safety = ..... 90**

**Scenario:** Synthesis of DiTosylBenzyl Tacn (8)

**Description:** 3,6-Di(tosyl)-3,6-diazaoctane-1,8-di(toluene-4-sulfonate) (7) was not present in the database so 1,4,7,10-tetrakis(p-toluensulfonyl)-1,4,7,10-tetraazacyclododecane was used.

### iSUSTAIN 9

|                       |     |
|-----------------------|-----|
| 1. Waste Prevention   | 80  |
| 2. Atom Economy       | 40  |
| 3. Safe Raw Materials | 55  |
| 4. Safe Product       | 25  |
| 5. Safe Solvents      | 75  |
| 6. Energy Efficiency  | 0   |
| 7. Renewables         | 0   |
| 8. Process Complexity | 75  |
| 9. Catalysis          | 0   |
| 10. Biodegradability  | 25  |
| 11. Process Control   | 100 |
| 12. Safe Process      | 85  |

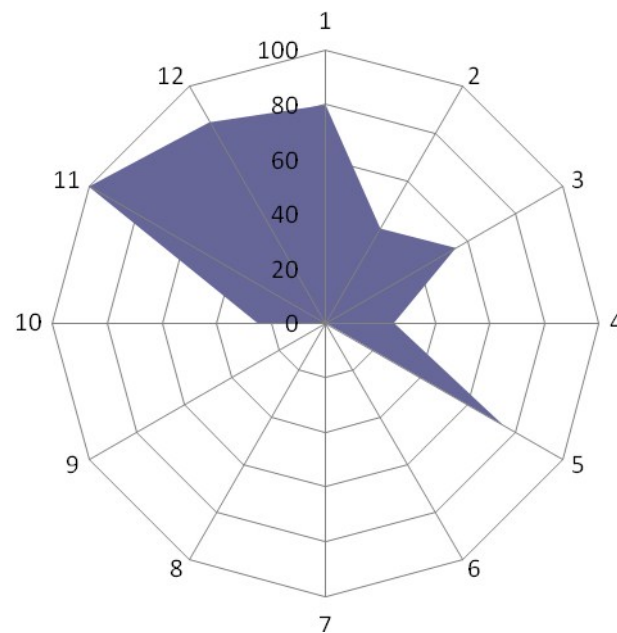

| Bill of Materials In                                               | Type of Material | Wt/Batch | Est. % Recycle | % Renew | Catalyst Mole % | Usage Wt/Wt | Safety | Health | Envir Impact | Regulations | MatImp | Contrib to Proc Tot |
|--------------------------------------------------------------------|------------------|----------|----------------|---------|-----------------|-------------|--------|--------|--------------|-------------|--------|---------------------|
| Benzylamine                                                        | Raw              | 8        | 0              | 0       | 0               | 0.345       | 100    | 55     | 100          | 100         | 85     | 4%                  |
| Potassium carbonate                                                | Auxiliary        | 20       | 0              | 0       | 0               | 0.905       | 100    | 65     | 100          | 100         | 88     | 10%                 |
| Acetonitrile                                                       | Solvent          | 600      | 80             | 80      | 0               | 5.455       | 55     | 65     | 100          | 100         | 73     | 61%                 |
| 1,4,7,10-tetrakis(p-toluensulfonyl)-1,4,7,10-tetraazacyclododecane | Raw              | 50       | 0              | 0       | 0               | 2.274       | 100    | 55     | 0            | 100         | 51     | 25%                 |

Metric 2) Atom Economy: Reaction Mass Efficiency = ..... 40

Metric 3) Safe Raw Materials: Total Process Material Impact = ..... 55

Metric 5) Safe Solvents: Total Process Auxiliary Material Impact = ..... 75

Metric 7) Renewables: Total % Process Renewable Feedstock (as-sold basis) = ..... 0

Metric 7) Renewables: Total % Process Renewable Feedstock (neat basis) = ..... 0

Metric 9) Minimum Catalyst Mole % = ..... 0

Metric 9) Normalized Catalyst Score % = ..... 0

| Bill of Materials Out | Type of Material | Wt/Batch | % Diluents | Severity Multiplier | Wt times Severity | Human Tox. Concern | Aq. Tox. Concern | Ultimate Biodeg. |
|-----------------------|------------------|----------|------------|---------------------|-------------------|--------------------|------------------|------------------|
| DiTosylBenzyl Tacn    | Product          | 22       | 0          |                     |                   | Moderate           | High             | 2                |
| Tosic Acid            | Waste Class 3    | 20       |            | 2                   | 40                |                    |                  |                  |
|                       |                  |          |            |                     |                   |                    |                  |                  |
|                       |                  |          |            |                     |                   |                    |                  |                  |

Metric 1) Environmental factor (E+-factor) = ..... 1.82

Metric 1) Waste Prevention: Normalized E+-Factor = ..... 80

Metric 4) Safe Product: DSfC = ..... 25

Metric 10) Biodegradability: Normalized Biodegradation = ..... 25

| Process Steps | Reactors, etc. | Asset Count | In-Process Add/Remove |
|---------------|----------------|-------------|-----------------------|
| Heated 6 days |                | 3           | 1                     |
| Filtration    |                | 2           | 1                     |
| Recryst       |                | 1           | 1                     |
| Step 4        |                | 0           | 0                     |

| Temp (° C.) | Time (Hrs) | Pressure (Atm) | Total Weight | Ave. Heat Capacity | Step EE |
|-------------|------------|----------------|--------------|--------------------|---------|
| 90          | 148        | 1              | 500          | 4.2                | 16952.7 |
|             | 0          | 1              | 0            | 0.0                | 0.0     |
|             | 0          | 1              | 0            | 0.0                | 0.0     |
|             | 0          | 1              | 0            | 0.0                | 0.0     |

**Metric 6) Total Energy Efficiency = ..... 16953**  
**Metric 6) Energy Efficiency: Normalized EE = ..... 0**  
**Metric 8) Process Complexity (PComplex) = ..... 6 + 3 = 9**  
**Metric 8) Process Complexity: Normalized PComplex = ..... 75**

| Question                                                                                                                           | Answer | Points |
|------------------------------------------------------------------------------------------------------------------------------------|--------|--------|
| 1) Does the potential exist in this process for the formation of hazardous side-products? (30 pts)                                 | No     | 30     |
| 2) Are adequate monitoring and control apparatus in place to quickly detect excursions in reactors and storage vessels? (0-50 pts) | Yes    | 50     |
| 3) Is the process common practice and/or in the scale-up or commercialization stages of production? (20 pts)                       | Yes    | 0      |
| a) Is there a regularly scheduled audit or check of this equipment? (10 pts)                                                       | Yes    | 10     |
| b) Do formal (written) catastrophe plans and emergency measures exist? (10 pts)                                                    | Yes    | 10     |

**Metric 11) Real-Time Analysis: Total RTA = ..... 100**

| Question |                                                                                                                                                                                                                                   | Risk     | Answer | Points |
|----------|-----------------------------------------------------------------------------------------------------------------------------------------------------------------------------------------------------------------------------------|----------|--------|--------|
| 1)       | Are any extreme conditions (pressure $\geq 10$ atm., temperature $\geq 200^\circ$ C. or $\leq -78^\circ$ C.) used in the process? (20 pts)                                                                                        | High     | No     | 0      |
| 2)       | Does the potential exist for a runaway exotherm under the process or upset conditions (including violent polymerization)? (20 pts)                                                                                                | High     | No     | 0      |
| 3)       | Do any of the process materials or mixtures present an explosion hazard (contact, dust and/or peroxide-forming)? (20 pts)                                                                                                         | High     | No     | 0      |
| 4)       | Are there any process materials present initially or formed during this process that might restrict or exclude its use in the intended production facility (other high hazards than mentioned above, strong odor, etc.)? (20 pts) | High     | No     | 0      |
| 5)       | Is pressure between 1.0 and 10 atm or less than 20 mm of Hg used in this process (other than process steps for which Q1 may be true)? (10 pts)                                                                                    | Moderate | No     | 0      |
| 6)       | Are temperatures ranging from $150^\circ$ to $199^\circ$ C. or $-50^\circ$ to $-78^\circ$ C. used in this process (other than process steps for which Q1 may be true)? (10 pts)                                                   | Moderate | No     | 0      |
| 7)       | Is the reaction mixture flammable? (10 pts)                                                                                                                                                                                       | Moderate | Yes    | 10     |
| 8)       | Are any of the process mixtures pyrophoric or hypergolic? (10 pts)                                                                                                                                                                | Moderate | No     | 0      |
| 9)       | Do any of the process mixtures react violently with water? (5 pts)                                                                                                                                                                | Mild     | No     | 0      |
| 10)      | Is a gas generated in any part of this process? (5 pts)                                                                                                                                                                           | Mild     | No     | 0      |
| 11)      | Are any of the process mixtures corrosive ( $\text{pH} \leq 2$ or $\geq 12$ )? (5 pts)                                                                                                                                            | Mild     | No     | 0      |
| 12)      | Are any of the process mixtures irritants or lachrymators? (5 pts)                                                                                                                                                                | Mild     | Yes    | 5      |

Total Yes Points = ..... 15

**Metric 12) Inherently Safer Chemistry: Process Safety = ..... 75**

**Scenario:** Synthesis of Ditosyl Tacn (9)

**Description:** DiTosylBenzyl Tacn (8) was not present in the database so 1,4,7,10-tetrakis(p-toluensulfonyl)-1,4,7,10-tetraazacyclododecane was used.

### iSUSTAIN 10

|                       |     |
|-----------------------|-----|
| 1. Waste Prevention   | 65  |
| 2. Atom Economy       | 75  |
| 3. Safe Raw Materials | 50  |
| 4. Safe Product       | 25  |
| 5. Safe Solvents      | 40  |
| 6. Energy Efficiency  | 100 |
| 7. Renewables         | 0   |
| 8. Process Complexity | 40  |
| 9. Catalysis          | 75  |
| 10. Biodegradability  | 25  |
| 11. Process Control   | 100 |
| 12. Safe Process      | 70  |

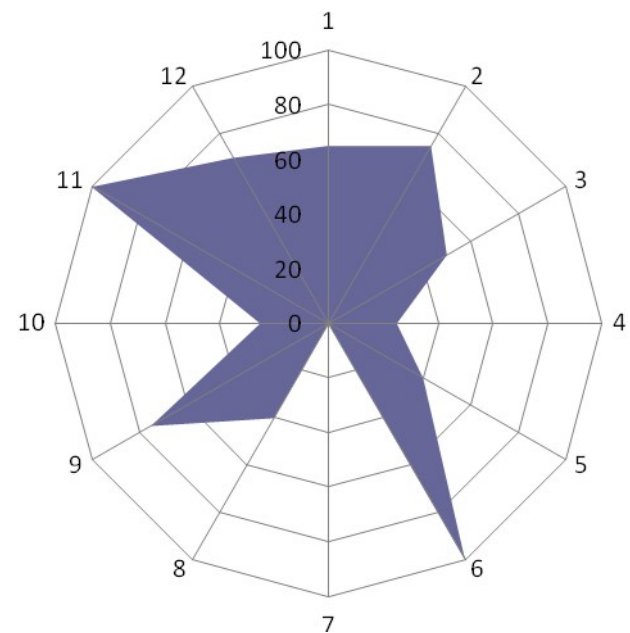





Metric 1) Environmental factor (E+-factor) = ..... 4.00  
 Metric 1) Waste Prevention: Normalized E+-Factor = ..... 65  
 Metric 4) Safe Product: DSfC = ..... 25  
 Metric 10) Biodegradability: Normalized Biodegradation = ..... 25

| Process Steps | Reactors, etc. | Asset Count | In-Process Add/Remove |
|---------------|----------------|-------------|-----------------------|
| Stirring      |                | 3           | 1                     |
| Stirring      |                | 2           | 1                     |
| Filtration    |                | 2           | 1                     |
| Wash          |                | 2           | 6                     |

| Temp (° C.) | Time (Hrs) | Pressure (Atm) | Total Weight | Ave. Heat Capacity | Step EE |
|-------------|------------|----------------|--------------|--------------------|---------|
| 25          | 24         | 1              | 100          | 4.2                | 0.0     |
| 25          | 1          | 1              | 100          | 4.2                | 0.0     |
|             | 0          | 1              | 0            | 0.0                | 0.0     |
|             | 0          | 1              | 0            | 0.0                | 0.0     |

Metric 6) Total Energy Efficiency = ..... 0  
 Metric 6) Energy Efficiency: Normalized EE = ..... 100  
 Metric 8) Process Complexity (PComplex) = .....  
 . 9 + 9 = 18  
 Metric 8) Process Complexity: Normalized PComplex = .....  
 . 40

| Question                                                                                                                           | Answer | Points |
|------------------------------------------------------------------------------------------------------------------------------------|--------|--------|
| 1) Does the potential exist in this process for the formation of hazardous side-products? (30 pts)                                 | No     | 30     |
| 2) Are adequate monitoring and control apparatus in place to quickly detect excursions in reactors and storage vessels? (0-50 pts) | Yes    | 50     |
| 3) Is the process common practice and/or in the scale-up or commercialization stages of production? (20 pts)                       | Yes    | 0      |
| a) Is there a regularly scheduled audit or check of this equipment? (10 pts)                                                       | Yes    | 10     |
| b) Do formal (written) catastrophe plans and emergency measures exist? (10 pts)                                                    | Yes    | 10     |

| Question                                                                                                                                                                                                                             | Risk     | Answer | Points |
|--------------------------------------------------------------------------------------------------------------------------------------------------------------------------------------------------------------------------------------|----------|--------|--------|
| 1) Are any extreme conditions (pressure $\geq 10$ atm., temperature $\geq 200^\circ$ C. or $\leq -78^\circ$ C.) used in the process? (20 pts)                                                                                        | High     | No     | 0      |
| 2) Does the potential exist for a runaway exotherm under the process or upset conditions (including violent polymerization)? (20 pts)                                                                                                | High     | No     | 0      |
| 3) Do any of the process materials or mixtures present an explosion hazard (contact, dust and/or peroxide-forming)? (20 pts)                                                                                                         | High     | No     | 0      |
| 4) Are there any process materials present initially or formed during this process that might restrict or exclude its use in the intended production facility (other high hazards than mentioned above, strong odor, etc.)? (20 pts) | High     | No     | 0      |
| 5) Is pressure between 1.0 and 10 atm or less than 20 mm of Hg used in this process (other than process steps for which Q1 may be true)? (10 pts)                                                                                    | Moderate | Yes    | 10     |
| 6) Are temperatures ranging from $150^\circ$ to $199^\circ$ C. or $-50^\circ$ to $-78^\circ$ C. used in this process (other than process steps for which Q1 may be true)? (10 pts)                                                   | Moderate | No     | 0      |
| 7) Is the reaction mixture flammable? (10 pts)                                                                                                                                                                                       | Moderate | Yes    | 10     |
| 8) Are any of the process mixtures pyrophoric or hypergolic? (10 pts)                                                                                                                                                                | Moderate | No     | 0      |
| 9) Do any of the process mixtures react violently with water? (5 pts)                                                                                                                                                                | Mild     | No     | 0      |
| 10) Is a gas generated in any part of this process? (5 pts)                                                                                                                                                                          | Mild     | No     | 0      |
| 11) Are any of the process mixtures corrosive ( $\text{pH} \leq 2$ or $\geq 12$ )? (5 pts)                                                                                                                                           | Mild     | Yes    | 5      |
| 12) Are any of the process mixtures irritants or lachrymators? (5 pts)                                                                                                                                                               | Mild     | Yes    | 5      |

Total Yes Points = ..... 30

**Metric 12) Inherently Safer Chemistry: Process Safety = .....**

**70**

**Scenario:** Synthesis of Tetratosyl bis(tacn) (14)

**Description:** 3,6-Di(tosyl)-3,6-diazaoctane-1,8-di(toluene-4-sulfonate) (7) was not present in the database so 1,4,7,10-tetrakis(p-toluensulfonyl)-1,4,7,10-tetraazacyclododecane was used.

### iSUSTAIN 11

|                       |     |
|-----------------------|-----|
| 1. Waste Prevention   | 85  |
| 2. Atom Economy       | 55  |
| 3. Safe Raw Materials | 50  |
| 4. Safe Product       | 25  |
| 5. Safe Solvents      | 75  |
| 6. Energy Efficiency  | 0   |
| 7. Renewables         | 0   |
| 8. Process Complexity | 20  |
| 9. Catalysis          | 0   |
| 10. Biodegradability  | 25  |
| 11. Process Control   | 100 |
| 12. Safe Process      | 80  |

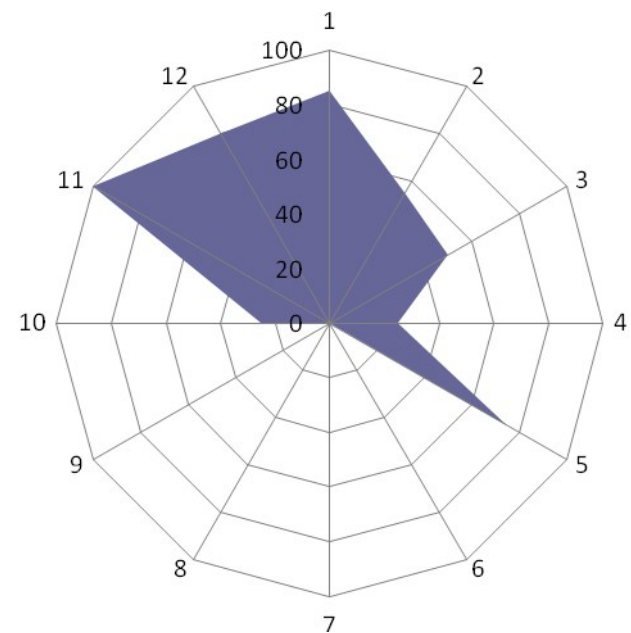

| Bill of Materials In                                                      | Type of Material | Wt/ Batch | Est. % Recycle | % Renew. | Catalyst Mole % | Usage Wt/Wt  | Safety     | Health    | Envir Impact | Regul Status | MatImp    | Contrib to Proc Tot |
|---------------------------------------------------------------------------|------------------|-----------|----------------|----------|-----------------|--------------|------------|-----------|--------------|--------------|-----------|---------------------|
| <b>1-3-Diaminopropane</b>                                                 | <b>Raw</b>       | <b>0</b>  | <b>0</b>       | <b>0</b> | <b>0</b>        | <b>0.081</b> | <b>85</b>  | <b>35</b> | <b>100</b>   | <b>100</b>   | <b>73</b> | <b>0%</b>           |
| Potassium carbonate                                                       | Auxiliary        | 2         | 0              | 0        | 0               | 0.623        | 100        | 65        | 100          | 100          | 88        | 3%                  |
| Acetonitrile                                                              | Solvent          | 60        | 0              | 0        | 0               | 20.000       | 55         | 65        | 100          | 100          | 73        | 89%                 |
| <b>1,4,7,10-Tetrakis(p-toluensulfonyl)-1,4,7,10-tetraazacyclododecane</b> | <b>Raw</b>       | <b>5</b>  | <b>0</b>       | <b>0</b> | <b>0</b>        | <b>1.667</b> | <b>100</b> | <b>55</b> | <b>0</b>     | <b>100</b>   | <b>51</b> | <b>7%</b>           |

Metric 2) Atom Economy: Reaction Mass Efficiency = ..... 55

Metric 3) Safe Raw Materials: Total Process Material Impact = ..... 50

Metric 5) Safe Solvents: Total Process Auxiliary Material Impact = ..... 75

..

Metric 7) Renewables: Total % Process Renewable Feedstock (as-sold basis) = ..... 0

..

Metric 7) Renewables: Total % Process Renewable Feedstock (neat basis) = ..... 0

Metric 9) Minimum Catalyst Mole % = ..... 0

..

Metric 9) Normalized Catalyst Score % = ..... 0

..

| Bill of Materials Out       | Type of Material | Wt/ Batch | % Diluents | Severity Multiplier | Wt times Severity | Human Tox. Concern | Aq. Tox. Concern | Ultimate Biodeg. |
|-----------------------------|------------------|-----------|------------|---------------------|-------------------|--------------------|------------------|------------------|
| <b>Tetratosyl Bis(tacn)</b> | <b>Product</b>   | 3         | 0          |                     |                   | Moderate           | High             | 2                |
| Tosic Acid                  | Waste Class 3    | 2         |            | 2                   | 4                 |                    |                  |                  |
|                             |                  |           |            |                     |                   |                    |                  |                  |
|                             |                  |           |            |                     |                   |                    |                  |                  |

Metric 1) Environmental factor (E+-factor) = ..... 1.33

..

Metric 1) Waste Prevention: Normalized E+-Factor = ..... 85

Metric 4) Safe Product: DSfC = ..... 25

Metric 10) Biodegradability: Normalized Biodegradation = ..... 25

..

| Process Steps        | Reactors, etc. | Asset Count | In-Process Add/Remove |
|----------------------|----------------|-------------|-----------------------|
| Heating and stirring |                | 3           | 1                     |
| Filtration           |                | 3           | 1                     |
| Rotavap x 2          |                | 4           | 2                     |
| Column               |                | 3           | 5                     |
| Treatment with acid  |                | 2           | 1                     |

| Temp (° C.) | Time (Hrs) | Pressure (Atm) | Total Weight | Ave. Heat Capacity | Step EE |
|-------------|------------|----------------|--------------|--------------------|---------|
| 90          | 240        | 1              | 100          | 4.2                | 40320.0 |
|             | 0          | 1              | 0            | 0.0                | 0.0     |
|             | 0          | 1              | 0            | 0.0                | 0.0     |
|             | 0          | 1              | 0            | 0.0                | 0.0     |
|             | 0          | 1              | 0            | 0.0                | 0.0     |

Metric 6) Total Energy Efficiency = ..... 40320

Metric 6) Energy Efficiency: Normalized EE = ..... 0

Metric 8) Process Complexity (PComplex) = .....  
 15 + 10 = 25

Metric 8) Process Complexity: Normalized PComplex = ..... 20

| Question                                                                                                                           | Answer | Points |
|------------------------------------------------------------------------------------------------------------------------------------|--------|--------|
| 1) Does the potential exist in this process for the formation of hazardous side-products? (30 pts)                                 | No     | 30     |
| 2) Are adequate monitoring and control apparatus in place to quickly detect excursions in reactors and storage vessels? (0-50 pts) | Yes    | 50     |
| 3) Is the process common practice and/or in the scale-up or commercialization stages of production? (20 pts)                       | Yes    | 0      |
| a) Is there a regularly scheduled audit or check of this equipment? (10 pts)                                                       | Yes    | 10     |
| b) Do formal (written) catastrophe plans and emergency measures exist? (10 pts)                                                    | Yes    | 10     |

Metric 11) Real-Time Analysis: Total RTA = ..... 100

| Question |                                                                                                                                                                                                                                   | Risk     | Answer | Points |
|----------|-----------------------------------------------------------------------------------------------------------------------------------------------------------------------------------------------------------------------------------|----------|--------|--------|
| 1)       | Are any extreme conditions (pressure $\geq 10$ atm., temperature $\geq 200^\circ$ C. or $\leq -78^\circ$ C.) used in the process? (20 pts)                                                                                        | High     | No     | 0      |
| 2)       | Does the potential exist for a runaway exotherm under the process or upset conditions (including violent polymerization)? (20 pts)                                                                                                | High     | No     | 0      |
| 3)       | Do any of the process materials or mixtures present an explosion hazard (contact, dust and/or peroxide-forming)? (20 pts)                                                                                                         | High     | No     | 0      |
| 4)       | Are there any process materials present initially or formed during this process that might restrict or exclude its use in the intended production facility (other high hazards than mentioned above, strong odor, etc.)? (20 pts) | High     | No     | 0      |
| 5)       | Is pressure between 1.0 and 10 atm or less than 20 mm of Hg used in this process (other than process steps for which Q1 may be true)? (10 pts)                                                                                    | Moderate | No     | 0      |
| 6)       | Are temperatures ranging from $150^\circ$ to $199^\circ$ C. or $-50^\circ$ to $-78^\circ$ C. used in this process (other than process steps for which Q1 may be true)? (10 pts)                                                   | Moderate | No     | 0      |
| 7)       | Is the reaction mixture flammable? (10 pts)                                                                                                                                                                                       | Moderate | Yes    | 10     |
| 8)       | Are any of the process mixtures pyrophoric or hypergolic? (10 pts)                                                                                                                                                                | Moderate | No     | 0      |
| 9)       | Do any of the process mixtures react violently with water? (5 pts)                                                                                                                                                                | Mild     | No     | 0      |
| 10)      | Is a gas generated in any part of this process? (5 pts)                                                                                                                                                                           | Mild     | No     | 0      |
| 11)      | Are any of the process mixtures corrosive ( $\text{pH} \leq 2$ or $\geq 12$ )? (5 pts)                                                                                                                                            | Mild     | Yes    | 5      |
| 12)      | Are any of the process mixtures irritants or lachrymators? (5 pts)                                                                                                                                                                | Mild     | Yes    | 5      |

Total Yes Points = ..... 20  
**Metric 12) Inherently Safer Chemistry: Process Safety = ..... 80**
